# Supplementary material for: Synthesis and characterization of sulfide/sulfone-containing 18-8-18-membered-ring ladder-type siloxanes
Source: Royal Society of Chemistry journal article supplement (doi:10.1039/d3dt01227a), 2023-01-01
Supplement: d3dt01227a1.pdf [file d3dt01227a1.pdf]

## Supporting Information

### Synthesis and Characterization of Sulfide/Sulfone-Containing 18-8-18-Membered-Ring Ladder-Type Siloxanes

Zhanjiang Zheng,<sup>\*a,b</sup> Yujia Liu,<sup>\*b</sup> Nobuhiro Takeda,<sup>b</sup> Masafumi Unno<sup>\*b</sup>

- a. College of Material, Chemistry and Chemical Engineering, Key Laboratory of Organosilicon Chemistry and Material Technology, Ministry of Education, Hangzhou Normal University, Hangzhou, 311121, Zhejiang, People's Republic of China
- b. Department of Chemistry and Chemical Biology, Graduate School of Science and Technology, Gunma University, Kiryu 376-8515, Japan

### Table of Contents

|                                                                     |            |
|---------------------------------------------------------------------|------------|
| <b>1. Experimental data.....</b>                                    | <b>S2</b>  |
| <b>2. NMR spectra for compounds 3, 5, 7, 8 and 9.....</b>           | <b>S8</b>  |
| <b>3. Infrared spectra for compounds 5, 7, 8 and 9.....</b>         | <b>S15</b> |
| <b>4. MALDI-TOF spectrum for compounds 5, 7, 8 and 9.....</b>       | <b>S18</b> |
| <b>5. X-ray diffraction and crystallography for compound 7.....</b> | <b>S20</b> |
| <b>6. X-ray diffraction and crystallography for compound 9.....</b> | <b>S31</b> |

## 1. Experimental data

### 1-1 General information

Unless specifically stated, all reagents were commercially obtained and when necessary, purified prior to use. Toluene was dried using mBRAUN purification system. Precursors bis(4-methoxybenzyl)sulfane (**1**) and bis(3-methoxybenzyl)sulfane (**4**) were prepared according to reported methods.<sup>[1]</sup> All reactions were conducted under argon atmosphere utilizing standard Schlenk technique. Flash column chromatography was performed over silica (100-200 mesh). The Fourier transformation nuclear magnetic resonance (NMR) spectra were obtained using a JEOL JNM-ECA 600 NMR instrument, with <sup>1</sup>H at 600.17 MHz, <sup>13</sup>C at 150.91 MHz, <sup>29</sup>Si at 119.24 MHz. For <sup>1</sup>H NMR, chemical shifts are reported as  $\delta$  units (ppm) relative to SiMe<sub>4</sub> (TMS), with residual solvent peaks serving as the standard. For <sup>13</sup>C NMR and <sup>29</sup>Si NMR, chemical shifts are reported as  $\delta$  units (ppm) relative to SiMe<sub>4</sub> (TMS), with residual solvent peaks serving as the standard, and spectra were obtained with complete proton decoupling. MALDI-TOF mass analysis were carried out with a Shimadzu AXIMA Performance instrument using 2,5-dihydroxybenzoic acid (dithranol) as the matrix. IR spectra were measured with a Shimadzu FTIR-8400S. TGA was conducted under a nitrogen flow (250 mL min<sup>-1</sup>) with a heating rate of 10 °C min<sup>-1</sup>. All samples were measured with temperatures ranging from 50 to 1000 °C, where they remained for 5 min. The weight loss and heating rate were continuously recorded throughout the experiment. Thin layer chromatography was performed using Silica.

### 1-2 Single-crystal crystallography studies

Single crystals of **7** and **9** suitable for X-ray structural analysis were obtained by slow recrystallization from dichloromethane/hexane after seven days. The colorless needle-shaped crystal was immersed in a drop of oil and mounted on a MicroMount. The intensity data were collected on a Rigaku VariMax with an XtaLab P200 diffractometer with multi-layer mirror monochromated Mo *K* $\alpha$  radiation ( $\lambda = 0.71075 \text{ \AA}$ ). The structures were solved using SHELXT,<sup>[2]</sup> and refined by full-matrix least-squares procedures on  $F^2$  for all reflections (SHELXL-2014/7).<sup>[3]</sup> All the non-hydrogen atoms were refined anisotropically. All hydrogens were placed using AFIX instructions. All calculations were carried out using Yadokari-XG2009.<sup>[4]</sup> Crystallographic data of

**7** and **9** have been deposited with Cambridge Crystallographic Data Centre: Deposition numbers CCDC-2254813 and 2254814, respectively. Copies of the data can be obtained free of charge via <http://www.ccdc.cam.ac.uk/conts/retrieving.html> (or from the Cambridge Crystallographic Data Centre, 12, Union Road, Cambridge, CB2 1EZ, U.K.; Fax: +44 1223 336033; e-mail: [deposit@ccdc.cam.ac.uk](mailto:deposit@ccdc.cam.ac.uk)).

### 1-3 The Piers-Rubinsztajn reaction between bis(4-methoxybenzyl)sulfane (**1**) and 1,1,3,3-tetramethyldisiloxane (**2**)

To a 50 mL Schlenk flask was added bis(4-methoxybenzyl)sulfane (**1**) (0.274 g, 1 mmol), dry toluene (18 mL) and 1,1,3,3-tetramethyldisiloxane (**2**) (0.18 mL, 1 mmol). And then tris(pentafluorophenyl)borane (26 mg, 0.05 mmol) was added. The mixture was stirred at room temperature for 20 hours before the addition of 0.3 g of basic alumina. The resulting mixture was filtered and concentrated on the rotavapor to give a crude product, which was purified by column chromatography (silica gel, hexane : EtOAc = 50 : 1) to give the partially substituted compound **3** (30 mg) and linear oligomers.

### 1-4 Synthesis of cyclic compound (**5**)

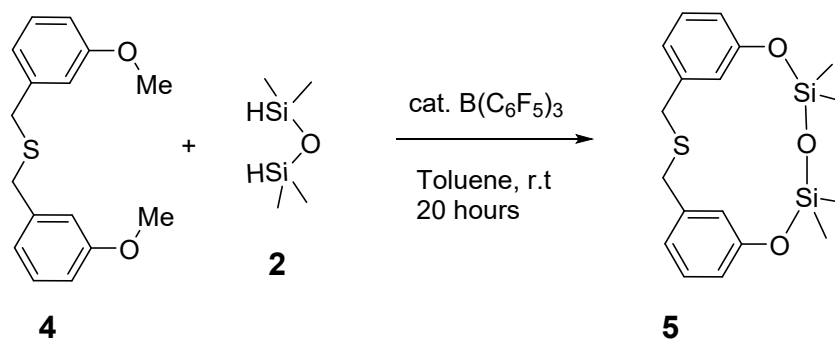

To a 50 mL Schlenk flask was added tris(pentafluorophenyl)borane (14.6 mg, 0.029 mmol, 5 mol%), dry toluene (15 mL) and bis(3-methoxybenzyl)sulfane (**4**) (0.157 g, 0.57 mmol). To this mixture, a solution of 1,1,3,3-tetramethyldisiloxane (**2**) (0.103 mL, 0.58 mmol) in 5 mL of dry toluene was added dropwise over 20 minutes. The reaction mixture was stirred at room temperature for 20 hours before the addition of 0.3 g of basic alumina. The resulting mixture was filtered and concentrated on the rotavapor to give a yellow oil, which was purified by column chromatography

(silica gel, hexane : EtOAc = 20 : 1) to give a white solid (0.11 g, 51% yield).

$^1\text{H}$  NMR (600.17 MHz,  $\text{CDCl}_3$ )  $\delta$  7.25 (t,  $J = 7.8$  Hz, 2H), 7.13 (d,  $J = 8.4$  Hz, 2H), 6.75 (d,  $J = 8.4$  Hz, 2H), 6.71 (s, 2H), 3.39 (s, 4H), 0.29 (s, 12H) ppm;

$^{13}\text{C}$  NMR (150.91 MHz,  $\text{CDCl}_3$ )  $\delta$  153.78, 139.58, 130.16, 122.56, 121.62, 118.72, 33.85,  $-0.54$  ppm;

$^{29}\text{Si}$  NMR (119.24 MHz,  $\text{CDCl}_3$ )  $\delta$   $-12.35$  (D-unit silicon) ppm;

MALDI-TOF MS ( $m/z$ ): 377.16 ( $[\text{M}+\text{H}]^+$ , calcd 377.10);

Elemental analysis: Calcd for  $\text{C}_{18}\text{H}_{24}\text{O}_3\text{SSi}_2$ : C, 57.41; H, 6.42. Found: C, 57.37; H, 6.39.

### 1-5 Synthesis of Ladder-type siloxane-based compound (7)

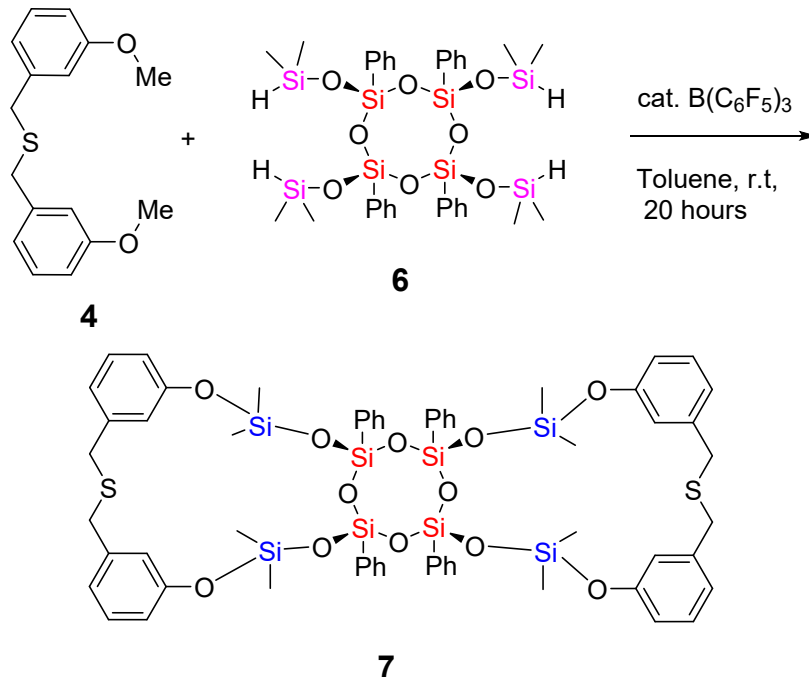

To a 50 mL Schlenk flask was added tris(pentafluorophenyl)borane (12 mg, 0.023 mmol, 5 mol%), dry toluene (15 mL) and bis(3-methoxybenzyl)sulfane (4) (0.24 g, 0.89 mmol). To this mixture, a solution of all-*cis*-cyclotetrasiloxane (6) (0.35 g, 0.45 mmol) in 5 mL of dry toluene was added dropwise over 20 minutes. The reaction mixture was stirred at room temperature for 20 hours before the addition of 0.3 g of basic alumina. The resulting mixture was filtered and concentrated on the rotavapor to give a yellow oil, which was purified by column chromatography (silica gel, hexane : EtOAc = 20 : 1) to give a white solid (0.18 g, 32% yield).

$^1\text{H}$  NMR (600.17 MHz,  $\text{CDCl}_3$ )  $\delta$  7.22 (t,  $J = 7.8$  Hz, 4H), 7.12-7.17 (m, 12H), 6.99 (t,  $J = 7.8$  Hz, 12H), 6.71 (s, 4H), 6.65 (d,  $J = 7.8$  Hz, 4H), 3.28-3.33 (ABq,  $J = 14.4$  Hz, 8H), 0.46 (s, 12H), 0.28 (s, 12H) ppm;

$^{13}\text{C}$  NMR (150.91 MHz,  $\text{CDCl}_3$ )  $\delta$  134.06, 130.18, 129.74, 127.57, 122.44, 121.12, 118.53, 34.38, 0.03,  $-0.28$  ppm;

$^{29}\text{Si}$  NMR (119.24 MHz,  $\text{CDCl}_3$ )  $\delta$   $-11.18$  (D-unit silicon),  $-79.08$  (T-unit silicon) ppm;

MALDI-TOF MS ( $m/z$ ): 1291.22 ( $[\text{M}+\text{Na}]^+$ , calcd 1291.85); 1307.79 ( $[\text{M}+\text{K}]^+$ , calcd 1307.19);

Elemental analysis: Calcd for  $\text{C}_{60}\text{H}_{68}\text{O}_{12}\text{S}_2\text{Si}_8$ : C, 56.75; H, 5.40. Found: C, 56.23; H, 5.41.

### 1-6 Synthesis of cyclic compound (8)

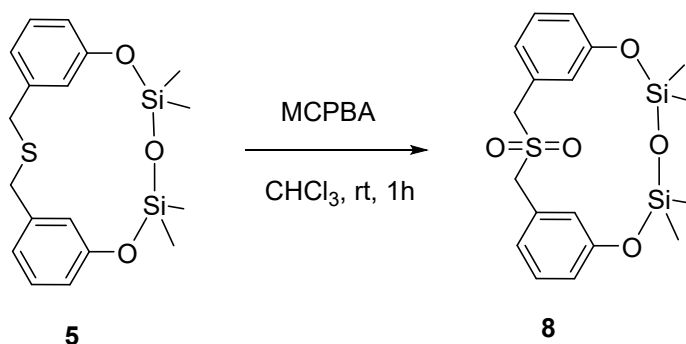

To a 30 mL flask was added **5** (37 mg, 0.1 mmol) and  $\text{CHCl}_3$  (5 mL). The mixture was cooled down to  $0^\circ\text{C}$ , and then *m*-chloroperoxybenzoic acid (69 mg, 0.40 mmol) was added at  $0^\circ\text{C}$ . The mixture was stirred at  $0^\circ\text{C}$  for 5 minutes, then at room temperature for 40 minutes. The mixture was quenched by saturated  $\text{Na}_2\text{S}_2\text{O}_3$  (15 mL), and the organic phase was washed with saturated  $\text{NaHCO}_3$  for 5 times, dried over anhydrous  $\text{Na}_2\text{SO}_4$  for 1 hour, and concentrated under vacuum to give a white solid, which was purified by column chromatography (silica gel, hexane : EtOAc = from 10 : 1 to 1 : 1) to give a white solid (40 mg, 99% yield).

$^1\text{H}$  NMR (600.17 MHz,  $\text{CDCl}_3$ )  $\delta$  7.32-7.35 (m, 4H), 6.90-6.91 (m, 2H), 6.79 (s, 2H), 3.94 (s, 4H), 0.29 (s, 12H) ppm;

$^{13}\text{C}$  NMR (150.91 MHz,  $\text{CDCl}_3$ )  $\delta$  154.47, 130.81, 129.52, 124.18, 122.02, 120.99, 56.80,  $-0.64$  ppm;

$^{29}\text{Si}$  NMR (119.24 MHz,  $\text{CDCl}_3$ )  $\delta$   $-11.51$  (D-unit silicon) ppm;

MALDI-TOF MS ( $m/z$ ): 431.95 ( $[M+Na]^+$ , calcd 431.08); 447.92 ( $[M+K]^+$ , calcd 447.05);  
Elemental analysis: Calcd for  $C_{18}H_{24}O_5SSi_2$ : C, 52.91; H, 5.92. Found: C, 53.25; H, 6.04.

### 1-7 Synthesis of Ladder-type siloxane-based compound (9)

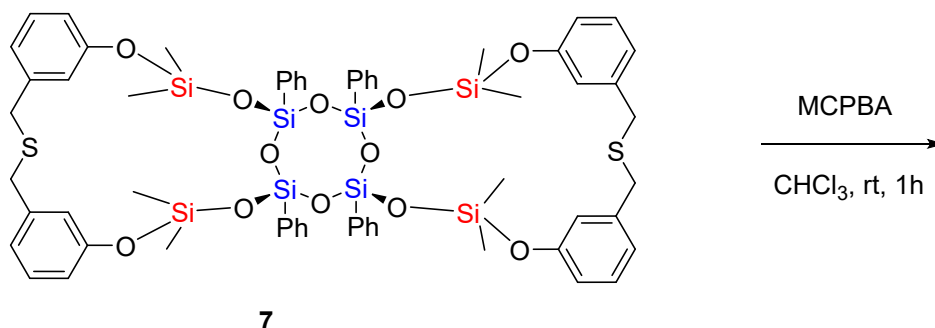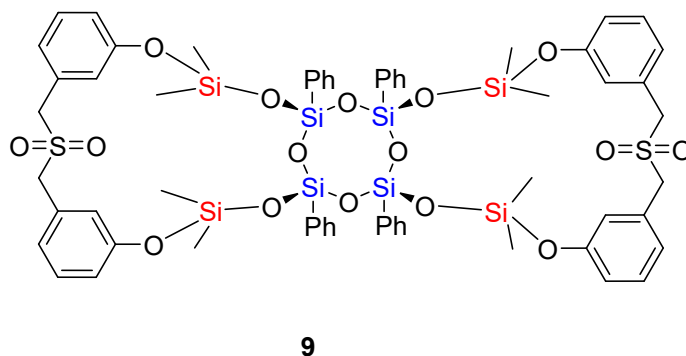

To a 30 mL flask was added **7** (38 mg, 0.03 mmol) and  $CHCl_3$  (5 mL). The mixture was cooled down to 0 °C, and then *m*-chloroperoxybenzoic acid (36 mg, 0.21 mmol) was added at 0 °C. The mixture was stirred at 0 °C for 15 minutes, then at room temperature for one hour. The mixture was quenched by saturated  $Na_2S_2O_3$  (15 mL), and the organic phase was washed with saturated  $NaHCO_3$  for 5 times, dried over anhydrous  $Na_2SO_4$  for 1 hour, and concentrated under vacuum to give a white solid, which was purified by column chromatograph (hexane : EtOAc = from 10 : 1 to 1 : 1) to give a white solid (36 mg, 89% yield).

$^1H$  NMR (600.17 MHz,  $CDCl_3$ )  $\delta$  7.20-7.24 (m, 8H), 7.15 (d,  $J = 7.8$  Hz, 4H), 7.06 (d,  $J = 7.8$  Hz, 8H), 6.98 (t,  $J = 7.8$  Hz, 8H), 6.79 (d,  $J = 7.2$  Hz, 4H), 6.69 (s, 4H), 3.67-3.77 (ABq,  $J = 14.4$  Hz, 8H), 0.50 (s, 12H), 0.29 (s, 12H) ppm;

$^{13}C$  NMR (150.91 MHz,  $CDCl_3$ )  $\delta$  154.26, 133.86, 131.14, 130.47, 130.28, 129.71, 127.73, 124.42,

122.45, 120.56, 56.94, 0.14, -0.36 ppm;

$^{29}\text{Si}$  NMR (119.24 MHz,  $\text{CDCl}_3$ )  $\delta$  -10.54 (D-unit silicon), -78.98 (T-unit silicon) ppm;

MALDI-TOF MS (m/z): 1355.99 ( $[\text{M}+\text{Na}]^+$ , calcd 1355.20), 1371.89 ( $[\text{M}+\text{K}]^+$ , calcd 1371.17);

Elemental analysis: Calcd for  $\text{C}_{60}\text{H}_{68}\text{O}_{16}\text{S}_2\text{Si}_8$ : C, 54.02; H, 5.14. Found: C, 53.49; H, 5.27.

## References

- 1 W. Yang, Y. Li, J. Zhu, W. Liu, J. Ke and C. He, Lewis acid-assisted Ir(III) reductive elimination enables construction of seven-membered-ring sulfoxides, *Chem. Sci.*, 2020, **11**, 10149-10158.
- 2 G. M. Sheldrick, SHELXT - integrated space-group and crystal-structure determination, *Acta Crystallogr., Sect. A: Found. Adv.*, 2015, **71**, 3–8.
- 3 G. M. Sheldrick, Crystal structure refinement with SHELXL, *Acta Crystallogr., Sect. C: Struct. Chem.*, 2015, **71**, 3–8.
- 4 C. Kabuto, S. Akine, T. Nemoto, E. Kwon, Release of software (Yadokari-XG 2009) for crystal structure analyses. *J. Cryst. Soc. Jpn.*, 2009, **51**, 218-224.

## 2. NMR spectra for compounds 3, 5, 7, 8 and 9.

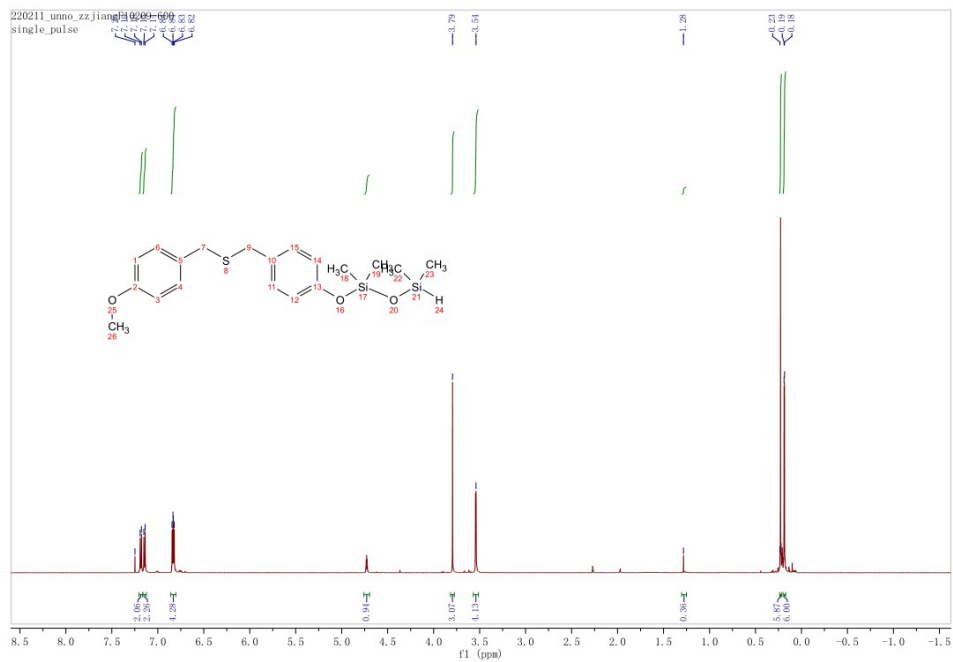

**Figure S1:** <sup>1</sup>H NMR spectrum of compound 3.

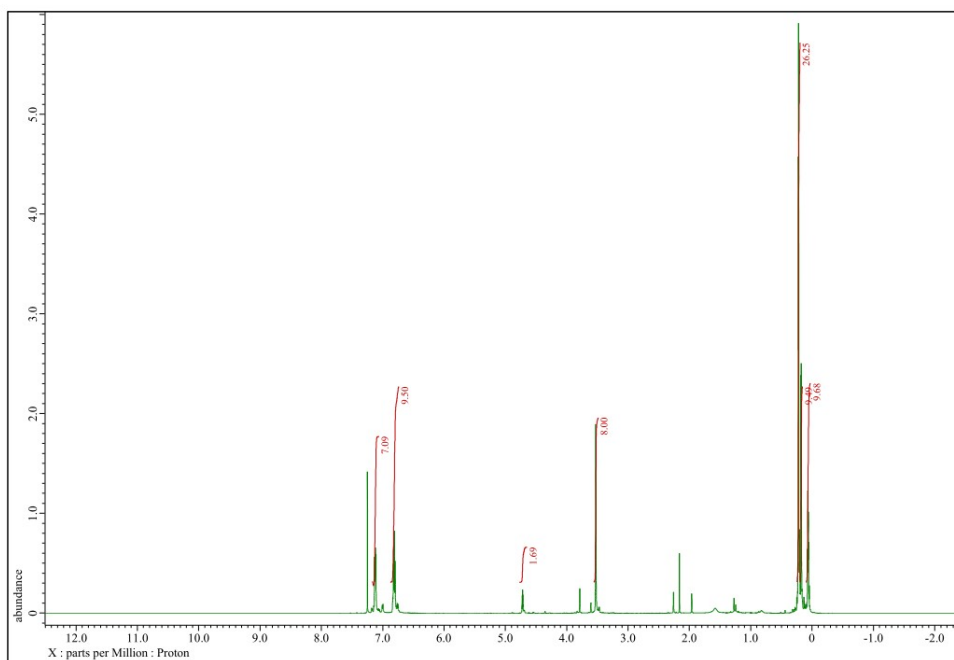

**Figure S2:** <sup>1</sup>H NMR spectrum of the obtained linear oligomers.



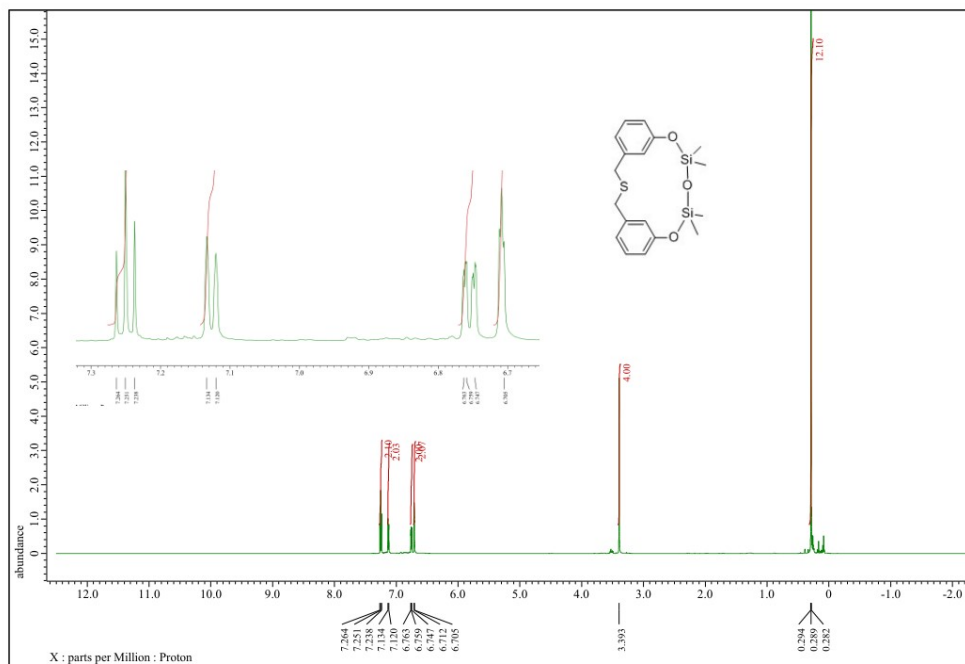

**Figure S3: <sup>1</sup>H NMR spectrum of compound 5.**

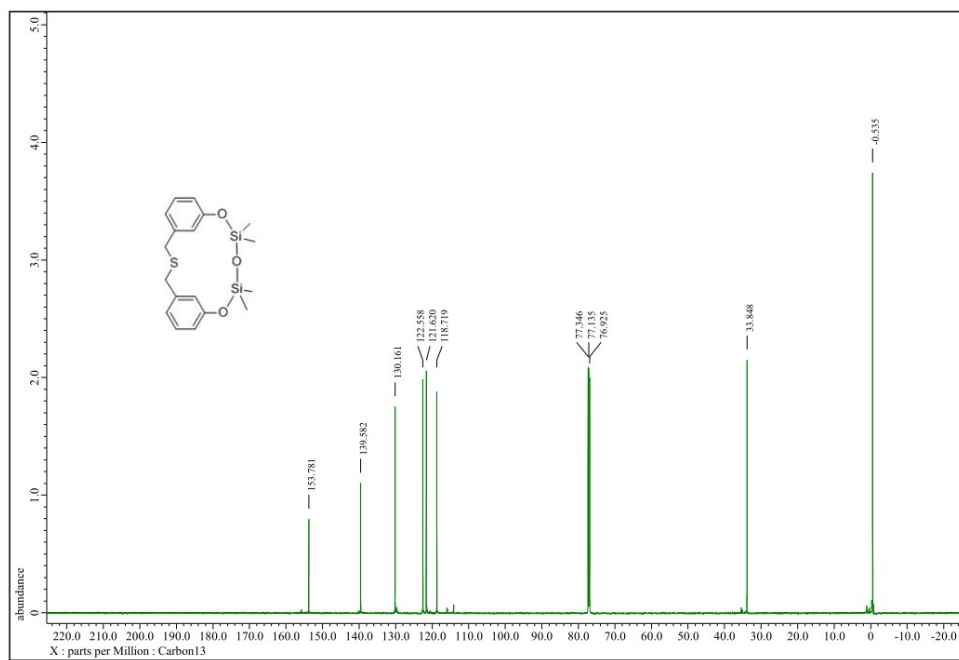

**Figure S4: <sup>13</sup>C NMR spectrum of compound 5.**



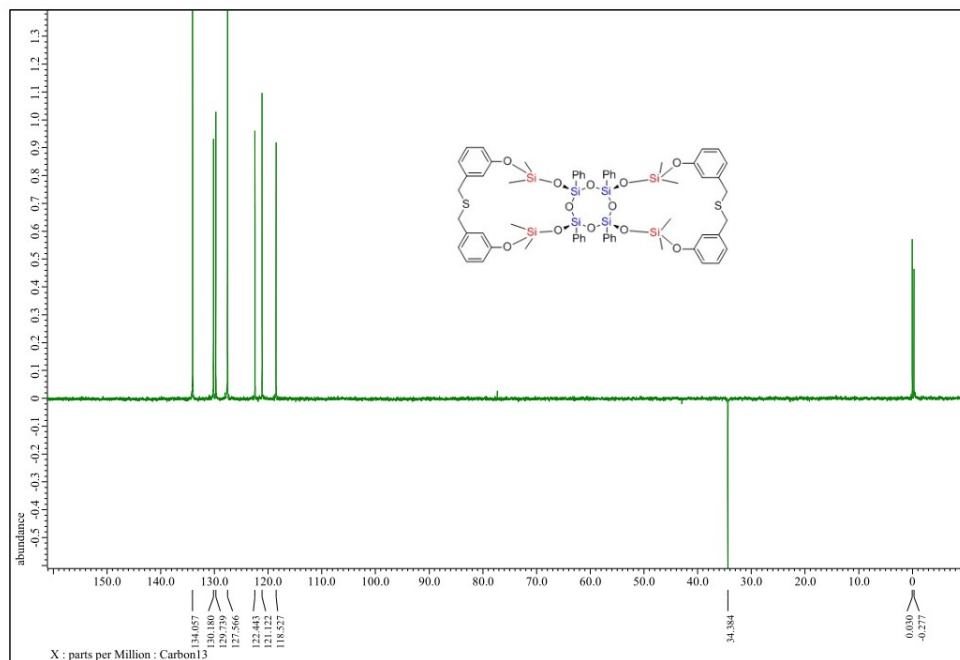

Figure S7:  $^{13}\text{C}$  NMR spectrum of compound 7.

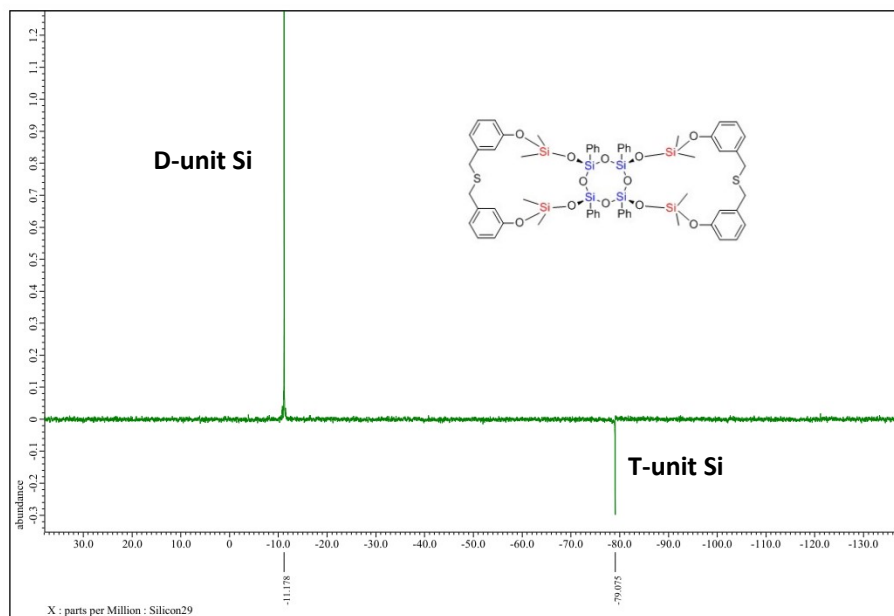

Figure S8:  $^{29}\text{Si}$  NMR spectrum of compound 7.





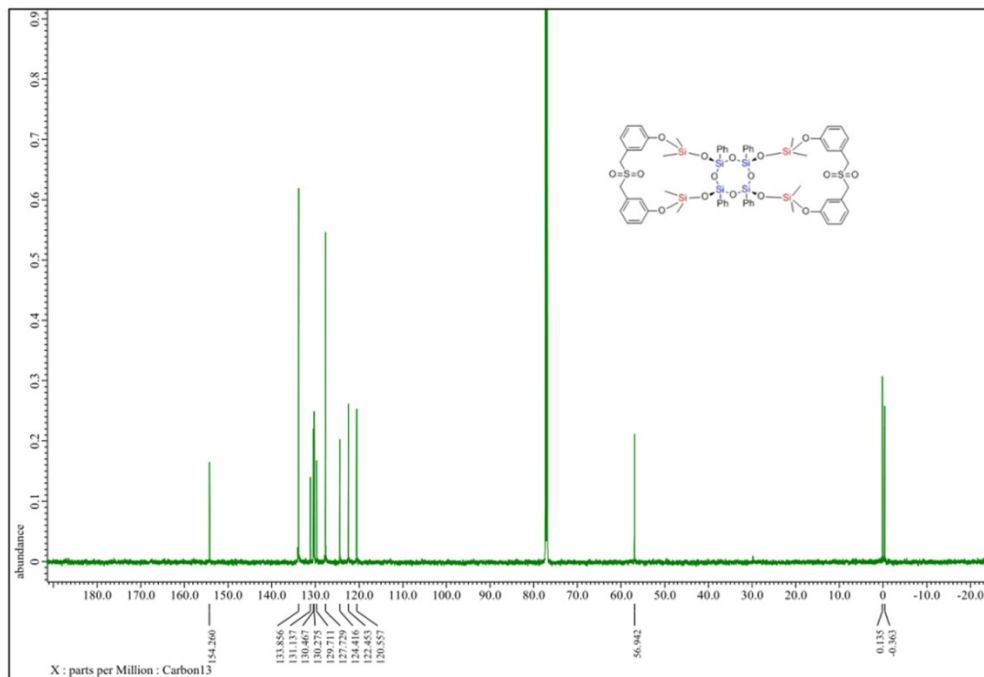

Figure S13:  $^{13}\text{C}$  NMR spectrum of compound **9**.

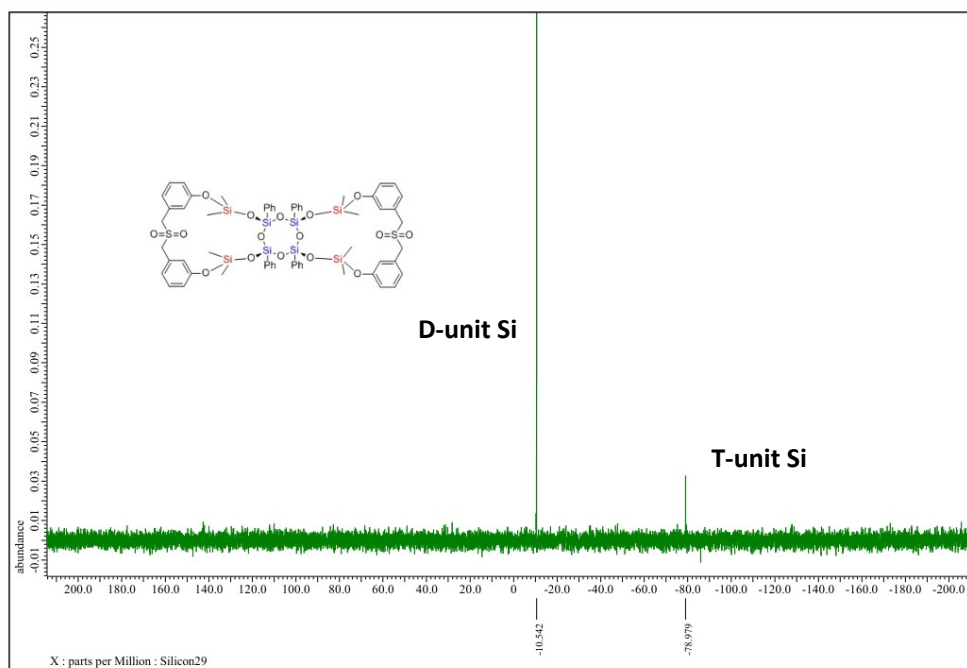

Figure S14:  $^{29}\text{Si}$  NMR spectrum of compound **9**.

### 3. Infrared spectra for compounds 5, 7, 8 and 9

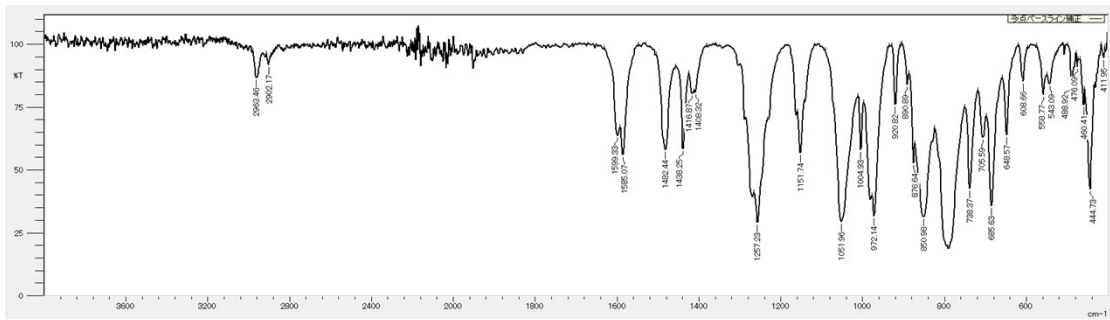

Figure S15: Infrared spectrum for 5.

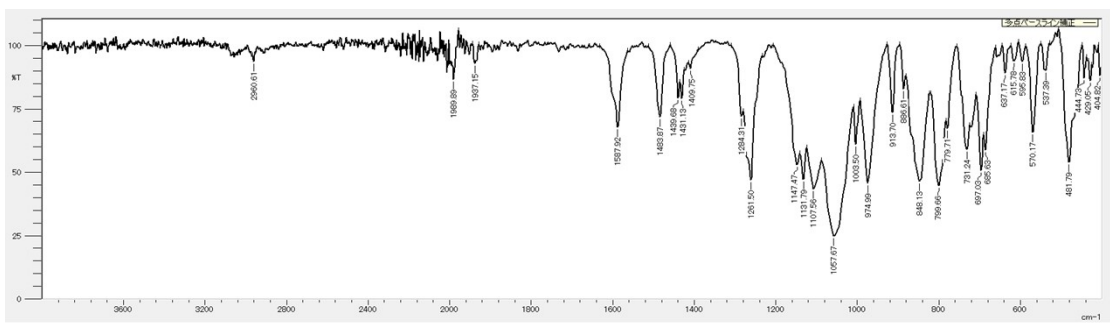

Figure S16: Infrared spectrum for 7.

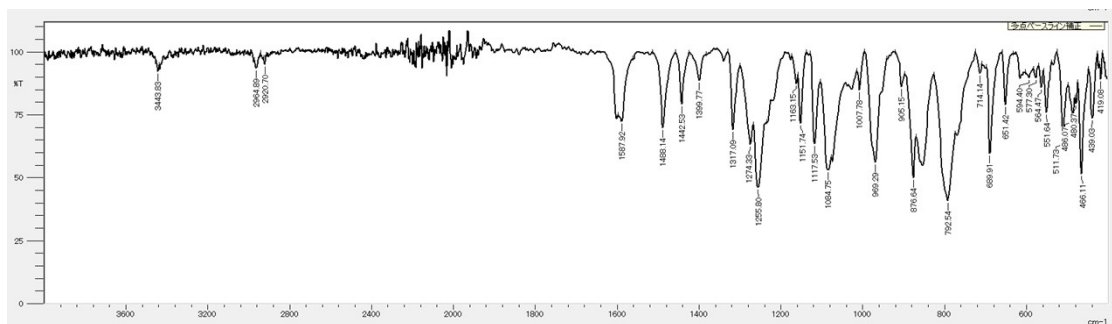

Figure S17: Infrared spectrum for 8.

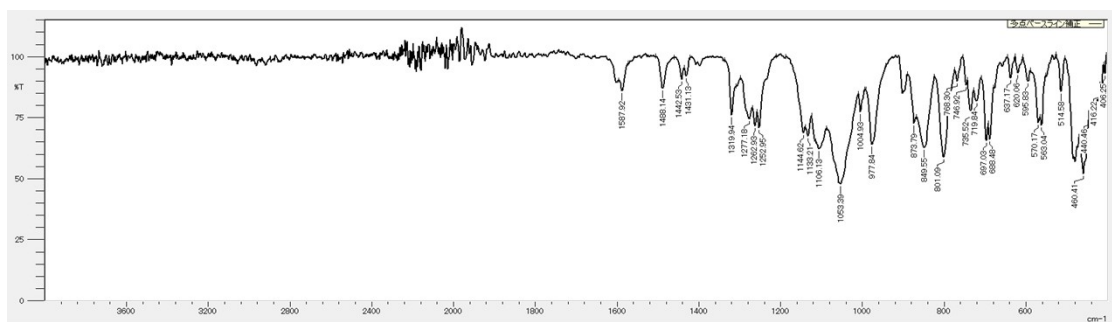

Figure S18: Infrared spectrum for 9.



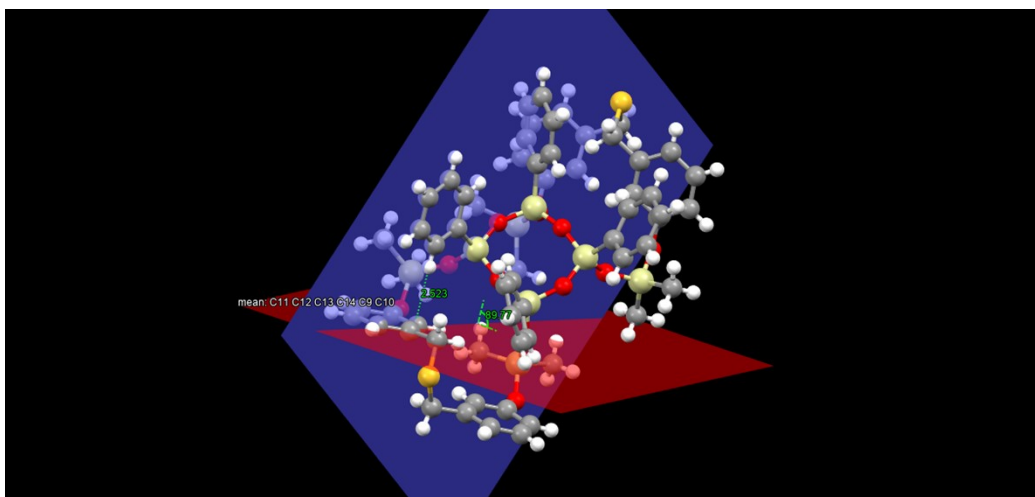

**Figure S19:** X-ray structure for compound 7.

#### 4. MALDI-TOF spectrum for compounds 5, 7, 8 and 9

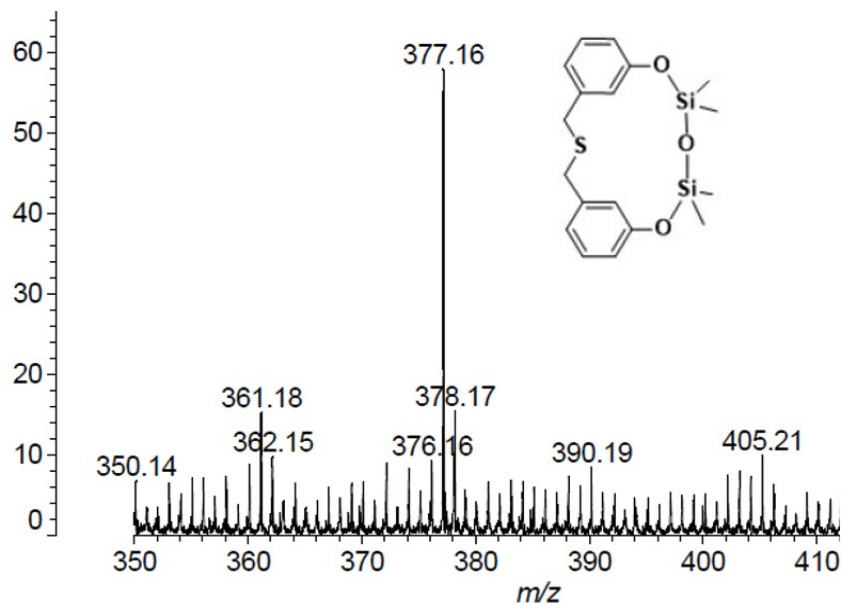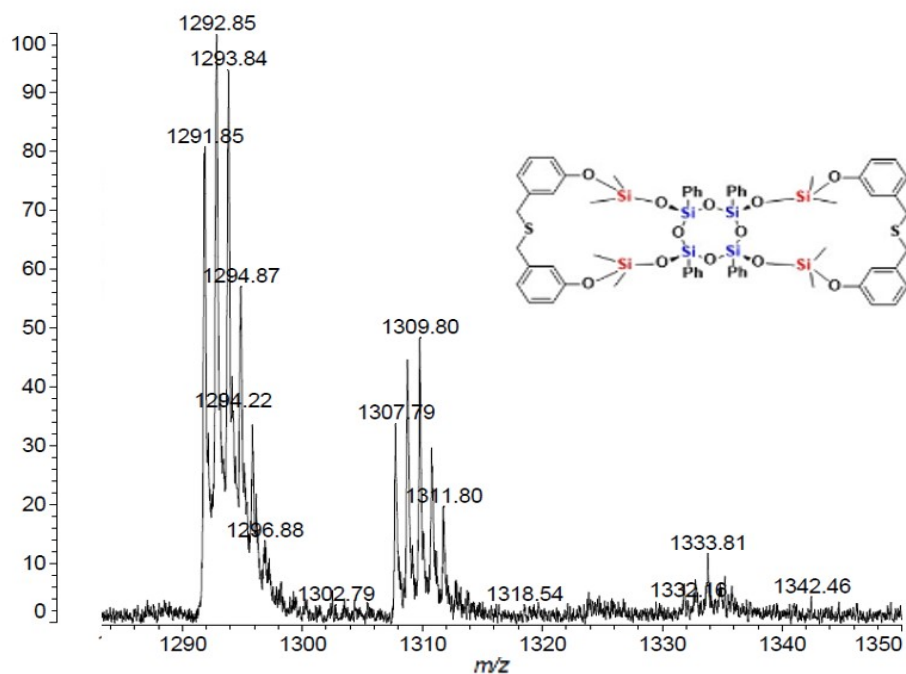

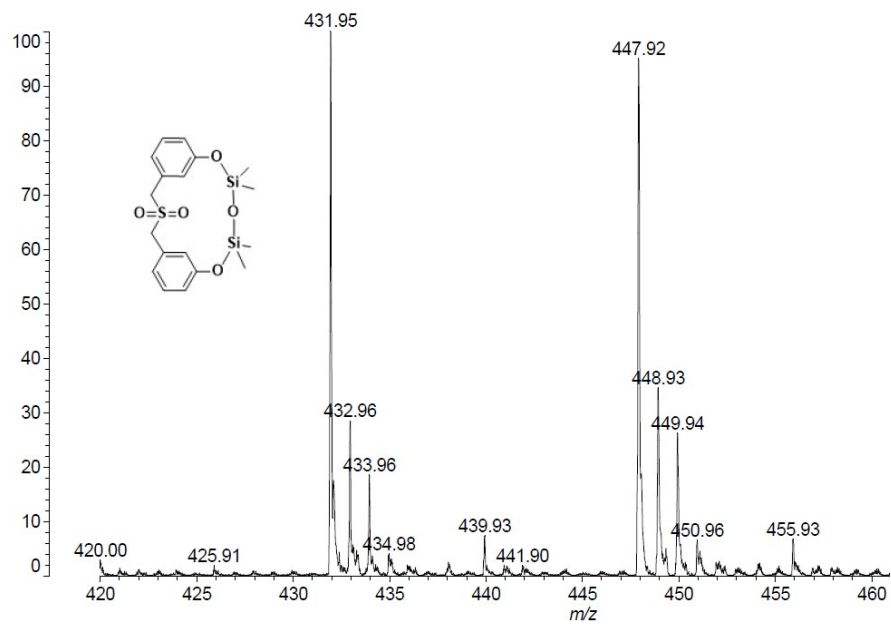

Figure S22: MALDI-TOF spectrum of compound **8**

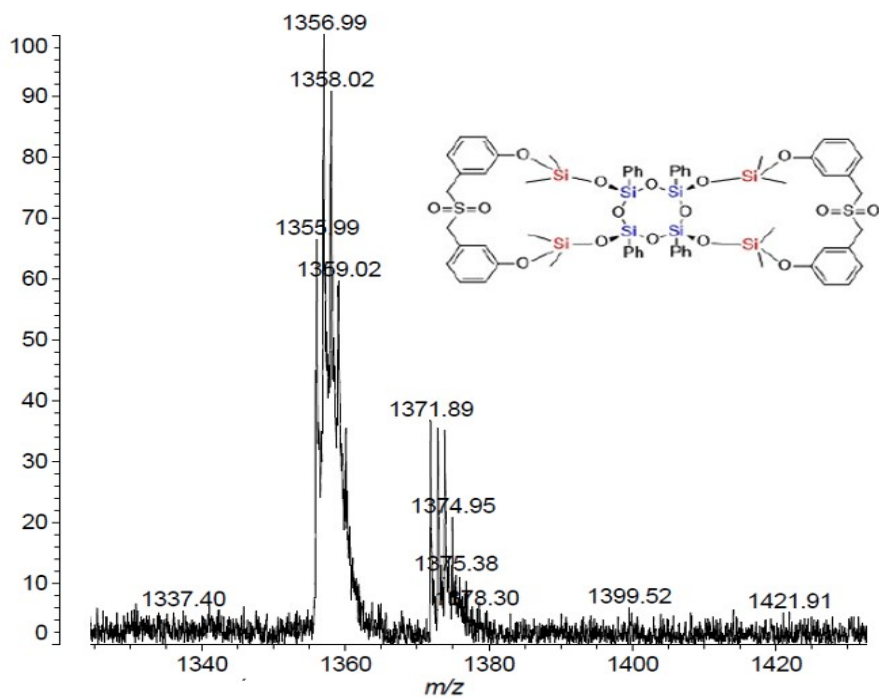

Figure S23: MALDI-TOF spectrum of compound **9**

## 5. X-ray diffraction and crystallography for compound 7

Table S1. Crystal data and structure refinement for 7.

|                                          |                                             |                 |
|------------------------------------------|---------------------------------------------|-----------------|
| Identification code                      | 22z03                                       |                 |
| Empirical formula                        | C60 H68 O12 S2 Si8                          |                 |
| Formula weight                           | 1269.98                                     |                 |
| Temperature                              | 120 K                                       |                 |
| Wavelength                               | 0.71075 Å                                   |                 |
| Crystal system                           | Monoclinic                                  |                 |
| Space group                              | P2 <sub>1</sub> /c                          |                 |
| Unit cell dimensions                     | a = 20.8502(18) Å                           | α = 90°.        |
|                                          | b = 10.6548(7) Å                            | β = 95.342(2)°. |
|                                          | c = 29.707(3) Å                             | γ = 90°.        |
| Volume                                   | 6570.9(10) Å <sup>3</sup>                   |                 |
| Z                                        | 4                                           |                 |
| Density (calculated)                     | 1.284 Mg/m <sup>3</sup>                     |                 |
| Absorption coefficient                   | 0.284 mm <sup>-1</sup>                      |                 |
| F(000)                                   | 2672                                        |                 |
| Crystal size                             | 0.38 x 0.23 x 0.09 mm <sup>3</sup>          |                 |
| Theta range for data collection          | 2.502 to 27.498°.                           |                 |
| Index ranges                             | -27 ≤ h ≤ 27, -13 ≤ k ≤ 13, -38 ≤ l ≤ 38    |                 |
| Reflections collected                    | 103916                                      |                 |
| Independent reflections                  | 14962 [R(int) = 0.0254]                     |                 |
| Completeness to theta = 25.242°          | 99.5 %                                      |                 |
| Absorption correction                    | Numerical                                   |                 |
| Max. and min. transmission               | 1.000 and 0.950                             |                 |
| Refinement method                        | Full-matrix least-squares on F <sup>2</sup> |                 |
| Data / restraints / parameters           | 14962 / 0 / 739                             |                 |
| Goodness-of-fit on F <sup>2</sup>        | 1.056                                       |                 |
| Final R indices [I > 2σ(I)] <sup>a</sup> | R1 = 0.0296, wR2 = 0.0775                   |                 |
| R indices (all data)                     | R1 = 0.0361, wR2 = 0.0819                   |                 |
| Extinction coefficient                   | n/a                                         |                 |
| Largest diff. peak and hole              | 0.381 and -0.322 e.Å <sup>-3</sup>          |                 |

$$^a R_1 = \sum ||F_o| - |F_c|| / \sum |F_o|, wR_2 = [(\sum w(F_o^2 - F_c^2)^2 / \sum w(F_o^2)^2)]^{1/2}.$$

Table S2. Atomic coordinates ( $\times 10^4$ ) and equivalent isotropic displacement parameters ( $\text{\AA}^2 \times 10^3$ ) for 7.  $U(\text{eq})$  is defined as one third of the trace of the orthogonalized  $U^{\text{ij}}$  tensor.

|       | x       | y       | z       | $U(\text{eq})$ |
|-------|---------|---------|---------|----------------|
| Si(1) | 1813(1) | 4538(1) | 1870(1) | 16(1)          |
| O(1)  | 2584(1) | 4656(1) | 1968(1) | 23(1)          |
| Si(2) | 3313(1) | 5019(1) | 2151(1) | 16(1)          |
| O(2)  | 3388(1) | 5013(1) | 2699(1) | 21(1)          |
| Si(3) | 3056(1) | 5044(1) | 3172(1) | 16(1)          |
| O(3)  | 2290(1) | 5155(1) | 3065(1) | 24(1)          |
| Si(4) | 1553(1) | 4862(1) | 2883(1) | 16(1)          |
| O(4)  | 1487(1) | 4679(1) | 2340(1) | 23(1)          |
| O(5)  | 1630(1) | 3183(1) | 1656(1) | 27(1)          |
| Si(5) | 1752(1) | 1690(1) | 1582(1) | 20(1)          |
| O(6)  | 1318(1) | 1278(1) | 1113(1) | 27(1)          |
| C(1)  | 1128(1) | 2034(1) | 748(1)  | 23(1)          |
| C(2)  | 478(1)  | 2250(2) | 644(1)  | 28(1)          |
| C(3)  | 278(1)  | 3024(2) | 280(1)  | 32(1)          |
| C(4)  | 722(1)  | 3552(2) | 17(1)   | 30(1)          |
| C(5)  | 1378(1) | 3302(1) | 112(1)  | 24(1)          |
| C(6)  | 1577(1) | 2546(1) | 479(1)  | 23(1)          |
| C(7)  | 1859(1) | 3830(2) | -188(1) | 27(1)          |
| S(1)  | 1946(1) | 5523(1) | -154(1) | 27(1)          |
| C(8)  | 2359(1) | 5642(2) | 409(1)  | 25(1)          |
| C(9)  | 3039(1) | 5136(1) | 451(1)  | 21(1)          |
| C(10) | 3493(1) | 5610(2) | 178(1)  | 26(1)          |
| C(11) | 4128(1) | 5213(2) | 241(1)  | 30(1)          |
| C(12) | 4323(1) | 4347(2) | 575(1)  | 26(1)          |
| C(13) | 3874(1) | 3874(1) | 848(1)  | 20(1)          |
| C(14) | 3233(1) | 4250(1) | 782(1)  | 21(1)          |
| O(7)  | 4068(1) | 3016(1) | 1185(1) | 23(1)          |
| Si(6) | 4358(1) | 3411(1) | 1704(1) | 17(1)          |

|       |         |         |         |       |
|-------|---------|---------|---------|-------|
| O(8)  | 3770(1) | 3940(1) | 1976(1) | 22(1) |
| O(9)  | 3248(1) | 3764(1) | 3443(1) | 23(1) |
| Si(7) | 3703(1) | 2530(1) | 3384(1) | 25(1) |
| O(10) | 3781(1) | 1806(1) | 3878(1) | 28(1) |
| C(15) | 4001(1) | 2427(1) | 4272(1) | 25(1) |
| C(16) | 4657(1) | 2569(2) | 4391(1) | 32(1) |
| C(17) | 4861(1) | 3211(2) | 4787(1) | 35(1) |
| C(18) | 4418(1) | 3701(2) | 5059(1) | 31(1) |
| C(19) | 3758(1) | 3542(1) | 4944(1) | 26(1) |
| C(20) | 3555(1) | 2897(1) | 4550(1) | 25(1) |
| C(21) | 3272(1) | 4079(2) | 5236(1) | 31(1) |
| S(2)  | 3162(1) | 5767(1) | 5177(1) | 31(1) |
| C(22) | 2756(1) | 5866(2) | 4610(1) | 29(1) |
| C(23) | 2080(1) | 5346(1) | 4564(1) | 24(1) |
| C(24) | 1602(1) | 5866(2) | 4805(1) | 30(1) |
| C(25) | 980(1)  | 5393(2) | 4751(1) | 34(1) |
| C(26) | 822(1)  | 4398(2) | 4460(1) | 29(1) |
| C(27) | 1295(1) | 3883(1) | 4220(1) | 23(1) |
| C(28) | 1922(1) | 4352(1) | 4269(1) | 23(1) |
| O(11) | 1161(1) | 2852(1) | 3948(1) | 28(1) |
| Si(8) | 848(1)  | 2854(1) | 3416(1) | 22(1) |
| C(29) | 1512(1) | 5768(1) | 1466(1) | 20(1) |
| C(30) | 1030(1) | 5520(2) | 1117(1) | 27(1) |
| C(31) | 820(1)  | 6448(2) | 812(1)  | 39(1) |
| C(32) | 1085(1) | 7635(2) | 845(1)  | 40(1) |
| C(33) | 1567(1) | 7902(2) | 1182(1) | 37(1) |
| C(34) | 1777(1) | 6979(1) | 1493(1) | 29(1) |
| C(35) | 3532(1) | 6594(1) | 1952(1) | 20(1) |
| C(36) | 3559(1) | 6832(2) | 1491(1) | 34(1) |
| C(37) | 3710(1) | 8008(2) | 1331(1) | 34(1) |
| C(38) | 3838(1) | 8976(2) | 1630(1) | 32(1) |
| C(39) | 3825(1) | 8766(2) | 2090(1) | 43(1) |
| C(40) | 3674(1) | 7585(2) | 2249(1) | 32(1) |

|       |         |         |         |       |
|-------|---------|---------|---------|-------|
| C(41) | 3340(1) | 6414(1) | 3516(1) | 20(1) |
| C(42) | 3905(1) | 6361(2) | 3809(1) | 27(1) |
| C(43) | 4117(1) | 7396(2) | 4066(1) | 36(1) |
| C(44) | 3770(1) | 8494(2) | 4037(1) | 36(1) |
| C(45) | 3204(1) | 8570(2) | 3755(1) | 35(1) |
| C(46) | 2992(1) | 7536(1) | 3495(1) | 28(1) |
| C(47) | 1047(1) | 6189(1) | 3037(1) | 20(1) |
| C(48) | 1159(1) | 6752(1) | 3463(1) | 25(1) |
| C(49) | 756(1)  | 7690(2) | 3598(1) | 33(1) |
| C(50) | 229(1)  | 8068(2) | 3311(1) | 36(1) |
| C(51) | 114(1)  | 7535(2) | 2888(1) | 36(1) |
| C(52) | 523(1)  | 6606(2) | 2750(1) | 29(1) |
| C(53) | 1452(1) | 759(2)  | 2042(1) | 35(1) |
| C(54) | 2613(1) | 1389(2) | 1531(1) | 35(1) |
| C(55) | 4664(1) | 1953(1) | 1979(1) | 28(1) |
| C(56) | 4979(1) | 4642(2) | 1696(1) | 32(1) |
| C(57) | 3291(1) | 1418(2) | 2982(1) | 44(1) |
| C(58) | 4490(1) | 3076(2) | 3220(1) | 38(1) |
| C(59) | 62(1)   | 3665(2) | 3360(1) | 38(1) |
| C(60) | 813(1)  | 1178(2) | 3270(1) | 44(1) |
| O(12) | 1342(1) | 3566(1) | 3107(1) | 24(1) |

---

Table S3. Bond lengths [Å] and angles [°] for 7.

---

|             |            |             |            |
|-------------|------------|-------------|------------|
| Si(1)-O(5)  | 1.6090(10) | C(6)-H(4)   | 0.9500     |
| Si(1)-O(1)  | 1.6120(10) | C(7)-S(1)   | 1.8153(16) |
| Si(1)-O(4)  | 1.6182(10) | C(7)-H(5)   | 0.9900     |
| Si(1)-C(29) | 1.8460(14) | C(7)-H(6)   | 0.9900     |
| O(1)-Si(2)  | 1.6130(10) | S(1)-C(8)   | 1.8135(14) |
| Si(2)-O(8)  | 1.6099(10) | C(8)-C(9)   | 1.5110(19) |
| Si(2)-O(2)  | 1.6189(10) | C(8)-H(7)   | 0.9900     |
| Si(2)-C(35) | 1.8511(14) | C(8)-H(8)   | 0.9900     |
| O(2)-Si(3)  | 1.6232(10) | C(9)-C(14)  | 1.395(2)   |
| Si(3)-O(3)  | 1.6039(10) | C(9)-C(10)  | 1.3967(19) |
| Si(3)-O(9)  | 1.6150(10) | C(10)-C(11) | 1.385(2)   |
| Si(3)-C(41) | 1.8479(14) | C(10)-H(9)  | 0.9500     |
| O(3)-Si(4)  | 1.6117(10) | C(11)-C(12) | 1.389(2)   |
| Si(4)-O(12) | 1.6116(10) | C(11)-H(10) | 0.9500     |
| Si(4)-O(4)  | 1.6167(10) | C(12)-C(13) | 1.3889(19) |
| Si(4)-C(47) | 1.8466(14) | C(12)-H(11) | 0.9500     |
| O(5)-Si(5)  | 1.6287(11) | C(13)-O(7)  | 1.3865(17) |
| Si(5)-O(6)  | 1.6506(11) | C(13)-C(14) | 1.3914(19) |
| Si(5)-C(53) | 1.8438(16) | C(14)-H(12) | 0.9500     |
| Si(5)-C(54) | 1.8445(16) | O(7)-Si(6)  | 1.6575(10) |
| O(6)-C(1)   | 1.3786(17) | Si(6)-O(8)  | 1.6297(10) |
| C(1)-C(2)   | 1.382(2)   | Si(6)-C(55) | 1.8417(15) |
| C(1)-C(6)   | 1.396(2)   | Si(6)-C(56) | 1.8452(15) |
| C(2)-C(3)   | 1.393(2)   | O(9)-Si(7)  | 1.6405(11) |
| C(2)-H(1)   | 0.9500     | Si(7)-O(10) | 1.6533(11) |
| C(3)-C(4)   | 1.385(2)   | Si(7)-C(57) | 1.8380(18) |
| C(3)-H(2)   | 0.9500     | Si(7)-C(58) | 1.8489(18) |
| C(4)-C(5)   | 1.396(2)   | O(10)-C(15) | 1.3838(18) |
| C(4)-H(3)   | 0.9500     | C(15)-C(16) | 1.389(2)   |
| C(5)-C(6)   | 1.390(2)   | C(15)-C(20) | 1.393(2)   |
| C(5)-C(7)   | 1.510(2)   | C(16)-C(17) | 1.391(2)   |



|             |            |             |            |
|-------------|------------|-------------|------------|
| C(16)-H(13) | 0.9500     | C(30)-H(25) | 0.9500     |
| C(17)-C(18) | 1.386(2)   | C(31)-C(32) | 1.381(3)   |
| C(17)-H(14) | 0.9500     | C(31)-H(26) | 0.9500     |
| C(18)-C(19) | 1.397(2)   | C(32)-C(33) | 1.381(3)   |
| C(18)-H(15) | 0.9500     | C(32)-H(27) | 0.9500     |
| C(19)-C(20) | 1.390(2)   | C(33)-C(34) | 1.390(2)   |
| C(19)-C(21) | 1.509(2)   | C(33)-H(28) | 0.9500     |
| C(20)-H(16) | 0.9500     | C(34)-H(29) | 0.9500     |
| C(21)-S(2)  | 1.8193(18) | C(35)-C(40) | 1.390(2)   |
| C(21)-H(17) | 0.9900     | C(35)-C(36) | 1.3984(19) |
| C(21)-H(18) | 0.9900     | C(36)-C(37) | 1.388(2)   |
| S(2)-C(22)  | 1.8164(15) | C(36)-H(30) | 0.9500     |
| C(22)-C(23) | 1.509(2)   | C(37)-C(38) | 1.371(2)   |
| C(22)-H(19) | 0.9900     | C(37)-H(31) | 0.9500     |
| C(22)-H(20) | 0.9900     | C(38)-C(39) | 1.385(2)   |
| C(23)-C(28) | 1.394(2)   | C(38)-H(32) | 0.9500     |
| C(23)-C(24) | 1.396(2)   | C(39)-C(40) | 1.390(2)   |
| C(24)-C(25) | 1.387(2)   | C(39)-H(33) | 0.9500     |
| C(24)-H(21) | 0.9500     | C(40)-H(34) | 0.9500     |
| C(25)-C(26) | 1.387(2)   | C(41)-C(46) | 1.396(2)   |
| C(25)-H(22) | 0.9500     | C(41)-C(42) | 1.399(2)   |
| C(26)-C(27) | 1.383(2)   | C(42)-C(43) | 1.390(2)   |
| C(26)-H(23) | 0.9500     | C(42)-H(35) | 0.9500     |
| C(27)-O(11) | 1.3777(17) | C(43)-C(44) | 1.375(3)   |
| C(27)-C(28) | 1.392(2)   | C(43)-H(36) | 0.9500     |
| C(28)-H(24) | 0.9500     | C(44)-C(45) | 1.384(3)   |
| O(11)-Si(8) | 1.6521(11) | C(44)-H(37) | 0.9500     |
| Si(8)-O(12) | 1.6299(10) | C(45)-C(46) | 1.394(2)   |
| Si(8)-C(60) | 1.8383(18) | C(45)-H(38) | 0.9500     |
| Si(8)-C(59) | 1.8452(18) | C(46)-H(39) | 0.9500     |
| C(29)-C(30) | 1.3993(19) | C(47)-C(52) | 1.395(2)   |
| C(29)-C(34) | 1.404(2)   | C(47)-C(48) | 1.402(2)   |
| C(30)-C(31) | 1.385(2)   | C(48)-C(49) | 1.390(2)   |

|             |          |                   |           |
|-------------|----------|-------------------|-----------|
| C(48)-H(40) | 0.9500   | O(5)-Si(1)-O(1)   | 109.81(6) |
| C(49)-C(50) | 1.386(3) | O(5)-Si(1)-O(4)   | 108.73(6) |
| C(49)-H(41) | 0.9500   | O(1)-Si(1)-O(4)   | 109.11(5) |
| C(50)-C(51) | 1.380(3) | O(5)-Si(1)-C(29)  | 109.08(6) |
| C(50)-H(42) | 0.9500   | O(1)-Si(1)-C(29)  | 109.62(6) |
| C(51)-C(52) | 1.394(2) | O(4)-Si(1)-C(29)  | 110.47(6) |
| C(51)-H(43) | 0.9500   | Si(1)-O(1)-Si(2)  | 166.60(7) |
| C(52)-H(44) | 0.9500   | O(8)-Si(2)-O(1)   | 106.70(6) |
| C(53)-H(45) | 0.9800   | O(8)-Si(2)-O(2)   | 108.52(5) |
| C(53)-H(46) | 0.9800   | O(1)-Si(2)-O(2)   | 109.73(5) |
| C(53)-H(47) | 0.9800   | O(8)-Si(2)-C(35)  | 111.94(6) |
| C(54)-H(48) | 0.9800   | O(1)-Si(2)-C(35)  | 111.18(6) |
| C(54)-H(49) | 0.9800   | O(2)-Si(2)-C(35)  | 108.73(6) |
| C(54)-H(50) | 0.9800   | Si(2)-O(2)-Si(3)  | 149.34(7) |
| C(55)-H(51) | 0.9800   | O(3)-Si(3)-O(9)   | 110.84(6) |
| C(55)-H(52) | 0.9800   | O(3)-Si(3)-O(2)   | 109.14(5) |
| C(55)-H(53) | 0.9800   | O(9)-Si(3)-O(2)   | 108.03(5) |
| C(56)-H(54) | 0.9800   | O(3)-Si(3)-C(41)  | 108.18(6) |
| C(56)-H(55) | 0.9800   | O(9)-Si(3)-C(41)  | 109.85(6) |
| C(56)-H(56) | 0.9800   | O(2)-Si(3)-C(41)  | 110.82(6) |
| C(57)-H(57) | 0.9800   | Si(3)-O(3)-Si(4)  | 162.39(7) |
| C(57)-H(58) | 0.9800   | O(12)-Si(4)-O(3)  | 108.41(6) |
| C(57)-H(59) | 0.9800   | O(12)-Si(4)-O(4)  | 107.90(6) |
| C(58)-H(60) | 0.9800   | O(3)-Si(4)-O(4)   | 110.40(5) |
| C(58)-H(61) | 0.9800   | O(12)-Si(4)-C(47) | 111.65(6) |
| C(58)-H(62) | 0.9800   | O(3)-Si(4)-C(47)  | 108.50(6) |
| C(59)-H(63) | 0.9800   | O(4)-Si(4)-C(47)  | 109.97(6) |
| C(59)-H(64) | 0.9800   | Si(4)-O(4)-Si(1)  | 150.38(7) |
| C(59)-H(65) | 0.9800   | Si(1)-O(5)-Si(5)  | 153.45(7) |
| C(60)-H(66) | 0.9800   | O(5)-Si(5)-O(6)   | 107.00(6) |
| C(60)-H(67) | 0.9800   | O(5)-Si(5)-C(53)  | 111.02(7) |
| C(60)-H(68) | 0.9800   | O(6)-Si(5)-C(53)  | 106.65(7) |
|             |          | O(5)-Si(5)-C(54)  | 110.25(7) |

|                   |            |                   |            |
|-------------------|------------|-------------------|------------|
| O(6)-Si(5)-C(54)  | 110.21(7)  | H(7)-C(8)-H(8)    | 107.6      |
| C(53)-Si(5)-C(54) | 111.55(8)  | C(14)-C(9)-C(10)  | 119.08(13) |
| C(1)-O(6)-Si(5)   | 127.14(9)  | C(14)-C(9)-C(8)   | 120.54(12) |
| O(6)-C(1)-C(2)    | 118.40(13) | C(10)-C(9)-C(8)   | 120.26(13) |
| O(6)-C(1)-C(6)    | 121.30(13) | C(11)-C(10)-C(9)  | 120.11(14) |
| C(2)-C(1)-C(6)    | 120.28(14) | C(11)-C(10)-H(9)  | 119.9      |
| C(1)-C(2)-C(3)    | 119.19(14) | C(9)-C(10)-H(9)   | 119.9      |
| C(1)-C(2)-H(1)    | 120.4      | C(10)-C(11)-C(12) | 120.81(13) |
| C(3)-C(2)-H(1)    | 120.4      | C(10)-C(11)-H(10) | 119.6      |
| C(4)-C(3)-C(2)    | 120.75(14) | C(12)-C(11)-H(10) | 119.6      |
| C(4)-C(3)-H(2)    | 119.6      | C(11)-C(12)-C(13) | 119.34(13) |
| C(2)-C(3)-H(2)    | 119.6      | C(11)-C(12)-H(11) | 120.3      |
| C(3)-C(4)-C(5)    | 120.20(15) | C(13)-C(12)-H(11) | 120.3      |
| C(3)-C(4)-H(3)    | 119.9      | O(7)-C(13)-C(12)  | 119.57(13) |
| C(5)-C(4)-H(3)    | 119.9      | O(7)-C(13)-C(14)  | 120.20(12) |
| C(6)-C(5)-C(4)    | 118.96(13) | C(12)-C(13)-C(14) | 120.22(13) |
| C(6)-C(5)-C(7)    | 120.87(13) | C(13)-C(14)-C(9)  | 120.40(12) |
| C(4)-C(5)-C(7)    | 120.16(14) | C(13)-C(14)-H(12) | 119.8      |
| C(5)-C(6)-C(1)    | 120.57(13) | C(9)-C(14)-H(12)  | 119.8      |
| C(5)-C(6)-H(4)    | 119.7      | C(13)-O(7)-Si(6)  | 124.07(9)  |
| C(1)-C(6)-H(4)    | 119.7      | O(8)-Si(6)-O(7)   | 108.86(5)  |
| C(5)-C(7)-S(1)    | 113.91(10) | O(8)-Si(6)-C(55)  | 108.51(6)  |
| C(5)-C(7)-H(5)    | 108.8      | O(7)-Si(6)-C(55)  | 106.23(6)  |
| S(1)-C(7)-H(5)    | 108.8      | O(8)-Si(6)-C(56)  | 108.84(7)  |
| C(5)-C(7)-H(6)    | 108.8      | O(7)-Si(6)-C(56)  | 111.33(6)  |
| S(1)-C(7)-H(6)    | 108.8      | C(55)-Si(6)-C(56) | 112.94(8)  |
| H(5)-C(7)-H(6)    | 107.7      | Si(2)-O(8)-Si(6)  | 154.38(7)  |
| C(8)-S(1)-C(7)    | 99.08(7)   | Si(3)-O(9)-Si(7)  | 137.88(6)  |
| C(9)-C(8)-S(1)    | 114.43(9)  | O(9)-Si(7)-O(10)  | 106.80(5)  |
| C(9)-C(8)-H(7)    | 108.7      | O(9)-Si(7)-C(57)  | 110.21(8)  |
| S(1)-C(8)-H(7)    | 108.7      | O(10)-Si(7)-C(57) | 106.11(7)  |
| C(9)-C(8)-H(8)    | 108.7      | O(9)-Si(7)-C(58)  | 108.25(7)  |
| S(1)-C(8)-H(8)    | 108.7      | O(10)-Si(7)-C(58) | 111.38(7)  |

|                   |            |                   |            |
|-------------------|------------|-------------------|------------|
| C(57)-Si(7)-C(58) | 113.87(9)  | C(28)-C(23)-C(24) | 118.99(14) |
| C(15)-O(10)-Si(7) | 121.64(9)  | C(28)-C(23)-C(22) | 120.13(13) |
| O(10)-C(15)-C(16) | 120.63(14) | C(24)-C(23)-C(22) | 120.86(14) |
| O(10)-C(15)-C(20) | 119.04(13) | C(25)-C(24)-C(23) | 120.12(14) |
| C(16)-C(15)-C(20) | 120.33(14) | C(25)-C(24)-H(21) | 119.9      |
| C(15)-C(16)-C(17) | 119.03(15) | C(23)-C(24)-H(21) | 119.9      |
| C(15)-C(16)-H(13) | 120.5      | C(26)-C(25)-C(24) | 120.93(14) |
| C(17)-C(16)-H(13) | 120.5      | C(26)-C(25)-H(22) | 119.5      |
| C(18)-C(17)-C(16) | 120.76(15) | C(24)-C(25)-H(22) | 119.5      |
| C(18)-C(17)-H(14) | 119.6      | C(27)-C(26)-C(25) | 119.03(14) |
| C(16)-C(17)-H(14) | 119.6      | C(27)-C(26)-H(23) | 120.5      |
| C(17)-C(18)-C(19) | 120.36(15) | C(25)-C(26)-H(23) | 120.5      |
| C(17)-C(18)-H(15) | 119.8      | O(11)-C(27)-C(26) | 120.20(13) |
| C(19)-C(18)-H(15) | 119.8      | O(11)-C(27)-C(28) | 118.98(13) |
| C(20)-C(19)-C(18) | 118.81(14) | C(26)-C(27)-C(28) | 120.73(14) |
| C(20)-C(19)-C(21) | 120.35(14) | C(27)-C(28)-C(23) | 120.20(13) |
| C(18)-C(19)-C(21) | 120.83(14) | C(27)-C(28)-H(24) | 119.9      |
| C(19)-C(20)-C(15) | 120.67(14) | C(23)-C(28)-H(24) | 119.9      |
| C(19)-C(20)-H(16) | 119.7      | C(27)-O(11)-Si(8) | 126.94(9)  |
| C(15)-C(20)-H(16) | 119.7      | O(12)-Si(8)-O(11) | 109.01(6)  |
| C(19)-C(21)-S(2)  | 113.81(11) | O(12)-Si(8)-C(60) | 109.35(7)  |
| C(19)-C(21)-H(17) | 108.8      | O(11)-Si(8)-C(60) | 103.21(7)  |
| S(2)-C(21)-H(17)  | 108.8      | O(12)-Si(8)-C(59) | 109.47(7)  |
| C(19)-C(21)-H(18) | 108.8      | O(11)-Si(8)-C(59) | 110.81(7)  |
| S(2)-C(21)-H(18)  | 108.8      | C(60)-Si(8)-C(59) | 114.74(10) |
| H(17)-C(21)-H(18) | 107.7      | C(30)-C(29)-C(34) | 117.84(13) |
| C(22)-S(2)-C(21)  | 100.99(8)  | C(30)-C(29)-Si(1) | 121.58(11) |
| C(23)-C(22)-S(2)  | 114.47(10) | C(34)-C(29)-Si(1) | 120.55(11) |
| C(23)-C(22)-H(19) | 108.6      | C(31)-C(30)-C(29) | 120.77(16) |
| S(2)-C(22)-H(19)  | 108.6      | C(31)-C(30)-H(25) | 119.6      |
| C(23)-C(22)-H(20) | 108.6      | C(29)-C(30)-H(25) | 119.6      |
| S(2)-C(22)-H(20)  | 108.6      | C(32)-C(31)-C(30) | 120.49(16) |
| H(19)-C(22)-H(20) | 107.6      | C(32)-C(31)-H(26) | 119.8      |

|                   |            |                   |            |
|-------------------|------------|-------------------|------------|
| C(30)-C(31)-H(26) | 119.8      | C(41)-C(42)-H(35) | 119.4      |
| C(31)-C(32)-C(33) | 119.98(15) | C(44)-C(43)-C(42) | 120.13(15) |
| C(31)-C(32)-H(27) | 120.0      | C(44)-C(43)-H(36) | 119.9      |
| C(33)-C(32)-H(27) | 120.0      | C(42)-C(43)-H(36) | 119.9      |
| C(32)-C(33)-C(34) | 119.89(17) | C(43)-C(44)-C(45) | 120.13(15) |
| C(32)-C(33)-H(28) | 120.1      | C(43)-C(44)-H(37) | 119.9      |
| C(34)-C(33)-H(28) | 120.1      | C(45)-C(44)-H(37) | 119.9      |
| C(33)-C(34)-C(29) | 121.01(15) | C(44)-C(45)-C(46) | 119.80(16) |
| C(33)-C(34)-H(29) | 119.5      | C(44)-C(45)-H(38) | 120.1      |
| C(29)-C(34)-H(29) | 119.5      | C(46)-C(45)-H(38) | 120.1      |
| C(40)-C(35)-C(36) | 117.22(13) | C(45)-C(46)-C(41) | 121.10(15) |
| C(40)-C(35)-Si(2) | 122.04(11) | C(45)-C(46)-H(39) | 119.5      |
| C(36)-C(35)-Si(2) | 120.74(11) | C(41)-C(46)-H(39) | 119.5      |
| C(37)-C(36)-C(35) | 122.00(14) | C(52)-C(47)-C(48) | 118.12(13) |
| C(37)-C(36)-H(30) | 119.0      | C(52)-C(47)-Si(4) | 121.70(11) |
| C(35)-C(36)-H(30) | 119.0      | C(48)-C(47)-Si(4) | 120.05(11) |
| C(38)-C(37)-C(36) | 119.60(14) | C(49)-C(48)-C(47) | 120.99(14) |
| C(38)-C(37)-H(31) | 120.2      | C(49)-C(48)-H(40) | 119.5      |
| C(36)-C(37)-H(31) | 120.2      | C(47)-C(48)-H(40) | 119.5      |
| C(37)-C(38)-C(39) | 119.80(15) | C(50)-C(49)-C(48) | 119.80(15) |
| C(37)-C(38)-H(32) | 120.1      | C(50)-C(49)-H(41) | 120.1      |
| C(39)-C(38)-H(32) | 120.1      | C(48)-C(49)-H(41) | 120.1      |
| C(38)-C(39)-C(40) | 120.44(15) | C(51)-C(50)-C(49) | 120.18(15) |
| C(38)-C(39)-H(33) | 119.8      | C(51)-C(50)-H(42) | 119.9      |
| C(40)-C(39)-H(33) | 119.8      | C(49)-C(50)-H(42) | 119.9      |
| C(39)-C(40)-C(35) | 120.91(14) | C(50)-C(51)-C(52) | 120.06(15) |
| C(39)-C(40)-H(34) | 119.5      | C(50)-C(51)-H(43) | 120.0      |
| C(35)-C(40)-H(34) | 119.5      | C(52)-C(51)-H(43) | 120.0      |
| C(46)-C(41)-C(42) | 117.73(13) | C(51)-C(52)-C(47) | 120.83(15) |
| C(46)-C(41)-Si(3) | 120.96(11) | C(51)-C(52)-H(44) | 119.6      |
| C(42)-C(41)-Si(3) | 121.31(11) | C(47)-C(52)-H(44) | 119.6      |
| C(43)-C(42)-C(41) | 121.10(15) | Si(5)-C(53)-H(45) | 109.5      |
| C(43)-C(42)-H(35) | 119.4      | Si(5)-C(53)-H(46) | 109.5      |

|                   |       |                   |           |
|-------------------|-------|-------------------|-----------|
| H(45)-C(53)-H(46) | 109.5 | H(61)-C(58)-H(62) | 109.5     |
| Si(5)-C(53)-H(47) | 109.5 | Si(8)-C(59)-H(63) | 109.5     |
| H(45)-C(53)-H(47) | 109.5 | Si(8)-C(59)-H(64) | 109.5     |
| H(46)-C(53)-H(47) | 109.5 | H(63)-C(59)-H(64) | 109.5     |
| Si(5)-C(54)-H(48) | 109.5 | Si(8)-C(59)-H(65) | 109.5     |
| Si(5)-C(54)-H(49) | 109.5 | H(63)-C(59)-H(65) | 109.5     |
| H(48)-C(54)-H(49) | 109.5 | H(64)-C(59)-H(65) | 109.5     |
| Si(5)-C(54)-H(50) | 109.5 | Si(8)-C(60)-H(66) | 109.5     |
| H(48)-C(54)-H(50) | 109.5 | Si(8)-C(60)-H(67) | 109.5     |
| H(49)-C(54)-H(50) | 109.5 | H(66)-C(60)-H(67) | 109.5     |
| Si(6)-C(55)-H(51) | 109.5 | Si(8)-C(60)-H(68) | 109.5     |
| Si(6)-C(55)-H(52) | 109.5 | H(66)-C(60)-H(68) | 109.5     |
| H(51)-C(55)-H(52) | 109.5 | H(67)-C(60)-H(68) | 109.5     |
| Si(6)-C(55)-H(53) | 109.5 | Si(4)-O(12)-Si(8) | 147.45(7) |
| H(51)-C(55)-H(53) | 109.5 |                   |           |
| H(52)-C(55)-H(53) | 109.5 |                   |           |
| Si(6)-C(56)-H(54) | 109.5 |                   |           |
| Si(6)-C(56)-H(55) | 109.5 |                   |           |
| H(54)-C(56)-H(55) | 109.5 |                   |           |
| Si(6)-C(56)-H(56) | 109.5 |                   |           |
| H(54)-C(56)-H(56) | 109.5 |                   |           |
| H(55)-C(56)-H(56) | 109.5 |                   |           |
| Si(7)-C(57)-H(57) | 109.5 |                   |           |
| Si(7)-C(57)-H(58) | 109.5 |                   |           |
| H(57)-C(57)-H(58) | 109.5 |                   |           |
| Si(7)-C(57)-H(59) | 109.5 |                   |           |
| H(57)-C(57)-H(59) | 109.5 |                   |           |
| H(58)-C(57)-H(59) | 109.5 |                   |           |
| Si(7)-C(58)-H(60) | 109.5 |                   |           |
| Si(7)-C(58)-H(61) | 109.5 |                   |           |
| H(60)-C(58)-H(61) | 109.5 |                   |           |
| Si(7)-C(58)-H(62) | 109.5 |                   |           |
| H(60)-C(58)-H(62) | 109.5 |                   |           |

## 6. X-ray diffraction and crystallography for compound 9

Table S4. Crystal data and structure refinement for 9.

|                                          |                                                                                |                 |
|------------------------------------------|--------------------------------------------------------------------------------|-----------------|
| Identification code                      | 22z02m                                                                         |                 |
| Empirical formula                        | C <sub>60</sub> H <sub>68</sub> O <sub>16</sub> S <sub>2</sub> Si <sub>8</sub> |                 |
| Formula weight                           | 1333.98                                                                        |                 |
| Temperature                              | 120 K                                                                          |                 |
| Wavelength                               | 0.71075 Å                                                                      |                 |
| Crystal system                           | Monoclinic                                                                     |                 |
| Space group                              | C2/c                                                                           |                 |
| Unit cell dimensions                     | a = 21.122(3) Å                                                                | α = 90°.        |
|                                          | b = 10.6780(18) Å                                                              | β = 94.396(4)°. |
|                                          | c = 29.541(5) Å                                                                | γ = 90°.        |
| Volume                                   | 6643.1(18) Å <sup>3</sup>                                                      |                 |
| Z                                        | 4                                                                              |                 |
| Density (calculated)                     | 1.334 Mg/m <sup>3</sup>                                                        |                 |
| Absorption coefficient                   | 0.289 mm <sup>-1</sup>                                                         |                 |
| F(000)                                   | 2800                                                                           |                 |
| Crystal size                             | 0.25 x 0.23 x 0.13 mm <sup>3</sup>                                             |                 |
| Theta range for data collection          | 2.766 to 27.499°.                                                              |                 |
| Index ranges                             | -27 ≤ h ≤ 27, -13 ≤ k ≤ 13, -38 ≤ l ≤ 38                                       |                 |
| Reflections collected                    | 51908                                                                          |                 |
| Independent reflections                  | 7612 [R(int) = 0.0239]                                                         |                 |
| Completeness to theta = 25.242°          | 99.8 %                                                                         |                 |
| Absorption correction                    | Numerical                                                                      |                 |
| Max. and min. transmission               | 1.000 and 0.949                                                                |                 |
| Refinement method                        | Full-matrix least-squares on F <sup>2</sup>                                    |                 |
| Data / restraints / parameters           | 7612 / 0 / 388                                                                 |                 |
| Goodness-of-fit on F <sup>2</sup>        | 1.096                                                                          |                 |
| Final R indices [I > 2σ(I)] <sup>a</sup> | R <sub>1</sub> = 0.0296, wR <sub>2</sub> = 0.0786                              |                 |
| R indices (all data)                     | R <sub>1</sub> = 0.0346, wR <sub>2</sub> = 0.0833                              |                 |
| Extinction coefficient                   | n/a                                                                            |                 |
| Largest diff. peak and hole              | 0.398 and -0.318 e.Å <sup>-3</sup>                                             |                 |

$$^a R_1 = \sum ||F_o| - |F_c|| / \sum |F_o|, wR_2 = [(\sum w(F_o^2 - F_c^2)^2) / \sum w(F_o^2)^2]^{1/2}.$$

Table S5. Atomic coordinates ( $\times 10^4$ ) and equivalent isotropic displacement parameters ( $\text{\AA}^2 \times 10^3$ ) for **9**.  $U(\text{eq})$  is defined as one third of the trace of the orthogonalized  $U^{ij}$  tensor.

|       | x       | y       | z       | $U(\text{eq})$ |
|-------|---------|---------|---------|----------------|
| O(1)  | 4057(1) | 6999(1) | 7330(1) | 24(1)          |
| Si(1) | 4383(1) | 6994(1) | 6852(1) | 16(1)          |
| O(2)  | 5130(1) | 7268(1) | 6949(1) | 26(1)          |
| Si(2) | 5868(1) | 7191(1) | 7126(1) | 16(1)          |
| O(3)  | 6171(1) | 5976(1) | 6900(1) | 22(1)          |
| Si(3) | 6715(1) | 5425(1) | 6592(1) | 17(1)          |
| O(4)  | 6404(1) | 5297(1) | 6062(1) | 20(1)          |
| C(1)  | 6264(1) | 6291(1) | 5774(1) | 18(1)          |
| C(2)  | 6735(1) | 6800(1) | 5528(1) | 22(1)          |
| C(3)  | 6586(1) | 7787(2) | 5234(1) | 25(1)          |
| C(4)  | 5975(1) | 8259(1) | 5180(1) | 23(1)          |
| C(5)  | 5499(1) | 7740(1) | 5424(1) | 18(1)          |
| C(6)  | 5646(1) | 6750(1) | 5721(1) | 18(1)          |
| C(7)  | 4836(1) | 8282(1) | 5380(1) | 19(1)          |
| S(1)  | 4416(1) | 8020(1) | 4839(1) | 19(1)          |
| O(5)  | 4819(1) | 8352(1) | 4486(1) | 28(1)          |
| O(6)  | 3809(1) | 8636(1) | 4843(1) | 26(1)          |
| C(8)  | 4293(1) | 6364(1) | 4809(1) | 21(1)          |
| C(9)  | 3829(1) | 5845(1) | 5123(1) | 19(1)          |
| C(10) | 3180(1) | 6080(1) | 5038(1) | 24(1)          |
| C(11) | 2750(1) | 5539(2) | 5311(1) | 28(1)          |
| C(12) | 2958(1) | 4765(2) | 5670(1) | 26(1)          |
| C(13) | 3602(1) | 4553(1) | 5761(1) | 21(1)          |
| C(14) | 4036(1) | 5084(1) | 5487(1) | 19(1)          |
| O(7)  | 3799(1) | 3783(1) | 6117(1) | 28(1)          |
| Si(4) | 4255(1) | 4135(1) | 6577(1) | 20(1)          |
| O(8)  | 4266(1) | 5654(1) | 6615(1) | 33(1)          |
| C(15) | 4041(1) | 8219(1) | 6467(1) | 17(1)          |



|       |         |          |         |       |
|-------|---------|----------|---------|-------|
| C(16) | 3522(1) | 7966(2)  | 6158(1) | 24(1) |
| C(17) | 3276(1) | 8888(2)  | 5863(1) | 32(1) |
| C(18) | 3542(1) | 10064(2) | 5869(1) | 34(1) |
| C(19) | 4057(1) | 10338(2) | 6169(1) | 32(1) |
| C(20) | 4304(1) | 9423(1)  | 6467(1) | 25(1) |
| C(21) | 6283(1) | 8624(1)  | 6964(1) | 22(1) |
| C(22) | 6158(1) | 9138(2)  | 6530(1) | 28(1) |
| C(23) | 6530(1) | 10098(2) | 6375(1) | 39(1) |
| C(24) | 7034(1) | 10555(2) | 6653(1) | 43(1) |
| C(25) | 7158(1) | 10086(2) | 7087(1) | 43(1) |
| C(26) | 6786(1) | 9128(2)  | 7241(1) | 32(1) |
| C(27) | 7410(1) | 6478(2)  | 6629(1) | 28(1) |
| C(28) | 6901(1) | 3801(2)  | 6763(1) | 29(1) |
| C(29) | 5069(1) | 3566(2)  | 6524(1) | 40(1) |
| C(30) | 3885(1) | 3426(2)  | 7057(1) | 44(1) |

---

Table S6. Bond lengths [Å] and angles [°] for **9**.

---

|              |            |             |            |
|--------------|------------|-------------|------------|
| O(1)-Si(1)   | 1.6161(11) | C(8)-C(9)   | 1.5064(19) |
| O(1)-Si(2)#1 | 1.6165(11) | C(8)-H(33)  | 0.9900     |
| Si(1)-O(8)   | 1.6040(12) | C(8)-H(34)  | 0.9900     |
| Si(1)-O(2)   | 1.6083(11) | C(9)-C(14)  | 1.391(2)   |
| Si(1)-C(15)  | 1.8439(14) | C(9)-C(10)  | 1.3955(19) |
| O(2)-Si(2)   | 1.6083(11) | C(10)-C(11) | 1.387(2)   |
| Si(2)-O(3)   | 1.6133(10) | C(10)-H(5)  | 0.9500     |
| Si(2)-O(1)#1 | 1.6164(11) | C(11)-C(12) | 1.390(2)   |
| Si(2)-C(21)  | 1.8454(16) | C(11)-H(6)  | 0.9500     |
| O(3)-Si(3)   | 1.6301(10) | C(12)-C(13) | 1.384(2)   |
| Si(3)-O(4)   | 1.6579(11) | C(12)-H(7)  | 0.9500     |
| Si(3)-C(28)  | 1.8400(16) | C(13)-O(7)  | 1.3752(18) |
| Si(3)-C(27)  | 1.8460(16) | C(13)-C(14) | 1.390(2)   |
| O(4)-C(1)    | 1.3786(17) | C(14)-H(8)  | 0.9500     |
| C(1)-C(2)    | 1.385(2)   | O(7)-Si(4)  | 1.6474(11) |
| C(1)-C(6)    | 1.3922(19) | Si(4)-O(8)  | 1.6258(12) |
| C(2)-C(3)    | 1.387(2)   | Si(4)-C(30) | 1.8338(18) |
| C(2)-H(1)    | 0.9500     | Si(4)-C(29) | 1.8421(18) |
| C(3)-C(4)    | 1.385(2)   | C(15)-C(16) | 1.3988(19) |
| C(3)-H(2)    | 0.9500     | C(15)-C(20) | 1.400(2)   |
| C(4)-C(5)    | 1.395(2)   | C(16)-C(17) | 1.389(2)   |
| C(4)-H(3)    | 0.9500     | C(16)-H(9)  | 0.9500     |
| C(5)-C(6)    | 1.395(2)   | C(17)-C(18) | 1.376(3)   |
| C(5)-C(7)    | 1.5111(19) | C(17)-H(10) | 0.9500     |
| C(6)-H(4)    | 0.9500     | C(18)-C(19) | 1.380(3)   |
| C(7)-S(1)    | 1.7892(14) | C(18)-H(11) | 0.9500     |
| C(7)-H(31)   | 0.9900     | C(19)-C(20) | 1.390(2)   |
| C(7)-H(32)   | 0.9900     | C(19)-H(12) | 0.9500     |
| S(1)-O(6)    | 1.4404(11) | C(20)-H(13) | 0.9500     |
| S(1)-O(5)    | 1.4414(11) | C(21)-C(26) | 1.398(2)   |
| S(1)-C(8)    | 1.7885(15) | C(21)-C(22) | 1.401(2)   |

|                    |           |                    |            |
|--------------------|-----------|--------------------|------------|
| C(22)-C(23)        | 1.390(2)  | O(2)-Si(2)-C(21)   | 109.92(7)  |
| C(22)-H(14)        | 0.9500    | O(3)-Si(2)-C(21)   | 110.34(6)  |
| C(23)-C(24)        | 1.382(3)  | O(1)#1-Si(2)-C(21) | 110.60(6)  |
| C(23)-H(15)        | 0.9500    | Si(2)-O(3)-Si(3)   | 147.20(7)  |
| C(24)-C(25)        | 1.381(3)  | O(3)-Si(3)-O(4)    | 108.16(6)  |
| C(24)-H(16)        | 0.9500    | O(3)-Si(3)-C(28)   | 109.39(7)  |
| C(25)-C(26)        | 1.389(3)  | O(4)-Si(3)-C(28)   | 104.08(7)  |
| C(25)-H(17)        | 0.9500    | O(3)-Si(3)-C(27)   | 109.82(6)  |
| C(26)-H(18)        | 0.9500    | O(4)-Si(3)-C(27)   | 111.18(6)  |
| C(27)-H(19)        | 0.9800    | C(28)-Si(3)-C(27)  | 113.95(8)  |
| C(27)-H(20)        | 0.9800    | C(1)-O(4)-Si(3)    | 124.82(9)  |
| C(27)-H(21)        | 0.9800    | O(4)-C(1)-C(2)     | 119.71(12) |
| C(28)-H(22)        | 0.9800    | O(4)-C(1)-C(6)     | 119.66(12) |
| C(28)-H(23)        | 0.9800    | C(2)-C(1)-C(6)     | 120.60(13) |
| C(28)-H(24)        | 0.9800    | C(1)-C(2)-C(3)     | 119.30(13) |
| C(29)-H(25)        | 0.9800    | C(1)-C(2)-H(1)     | 120.3      |
| C(29)-H(26)        | 0.9800    | C(3)-C(2)-H(1)     | 120.3      |
| C(29)-H(27)        | 0.9800    | C(4)-C(3)-C(2)     | 120.80(13) |
| C(30)-H(28)        | 0.9800    | C(4)-C(3)-H(2)     | 119.6      |
| C(30)-H(29)        | 0.9800    | C(2)-C(3)-H(2)     | 119.6      |
| C(30)-H(30)        | 0.9800    | C(3)-C(4)-C(5)     | 119.96(14) |
|                    |           | C(3)-C(4)-H(3)     | 120.0      |
| Si(1)-O(1)-Si(2)#1 | 148.52(7) | C(5)-C(4)-H(3)     | 120.0      |
| O(8)-Si(1)-O(2)    | 110.86(7) | C(4)-C(5)-C(6)     | 119.49(13) |
| O(8)-Si(1)-O(1)    | 108.83(6) | C(4)-C(5)-C(7)     | 120.24(13) |
| O(2)-Si(1)-O(1)    | 108.79(6) | C(6)-C(5)-C(7)     | 120.23(12) |
| O(8)-Si(1)-C(15)   | 108.90(6) | C(1)-C(6)-C(5)     | 119.84(12) |
| O(2)-Si(1)-C(15)   | 108.21(6) | C(1)-C(6)-H(4)     | 120.1      |
| O(1)-Si(1)-C(15)   | 111.25(6) | C(5)-C(6)-H(4)     | 120.1      |
| Si(2)-O(2)-Si(1)   | 164.06(8) | C(5)-C(7)-S(1)     | 114.17(9)  |
| O(2)-Si(2)-O(3)    | 108.13(6) | C(5)-C(7)-H(31)    | 108.7      |
| O(2)-Si(2)-O(1)#1  | 110.41(6) | S(1)-C(7)-H(31)    | 108.7      |
| O(3)-Si(2)-O(1)#1  | 107.39(6) | C(5)-C(7)-H(32)    | 108.7      |

|                   |            |                   |            |
|-------------------|------------|-------------------|------------|
| S(1)-C(7)-H(32)   | 108.7      | O(8)-Si(4)-O(7)   | 106.80(6)  |
| H(31)-C(7)-H(32)  | 107.6      | O(8)-Si(4)-C(30)  | 111.31(9)  |
| O(6)-S(1)-O(5)    | 117.91(7)  | O(7)-Si(4)-C(30)  | 106.71(8)  |
| O(6)-S(1)-C(8)    | 109.06(7)  | O(8)-Si(4)-C(29)  | 108.99(8)  |
| O(5)-S(1)-C(8)    | 107.31(7)  | O(7)-Si(4)-C(29)  | 110.14(8)  |
| O(6)-S(1)-C(7)    | 107.65(7)  | C(30)-Si(4)-C(29) | 112.71(10) |
| O(5)-S(1)-C(7)    | 109.15(7)  | Si(1)-O(8)-Si(4)  | 157.08(8)  |
| C(8)-S(1)-C(7)    | 105.03(7)  | C(16)-C(15)-C(20) | 117.89(13) |
| C(9)-C(8)-S(1)    | 115.56(10) | C(16)-C(15)-Si(1) | 121.06(11) |
| C(9)-C(8)-H(33)   | 108.4      | C(20)-C(15)-Si(1) | 121.03(11) |
| S(1)-C(8)-H(33)   | 108.4      | C(17)-C(16)-C(15) | 120.70(15) |
| C(9)-C(8)-H(34)   | 108.4      | C(17)-C(16)-H(9)  | 119.7      |
| S(1)-C(8)-H(34)   | 108.4      | C(15)-C(16)-H(9)  | 119.7      |
| H(33)-C(8)-H(34)  | 107.5      | C(18)-C(17)-C(16) | 120.32(15) |
| C(14)-C(9)-C(10)  | 119.28(13) | C(18)-C(17)-H(10) | 119.8      |
| C(14)-C(9)-C(8)   | 120.61(12) | C(16)-C(17)-H(10) | 119.8      |
| C(10)-C(9)-C(8)   | 120.05(13) | C(17)-C(18)-C(19) | 120.24(15) |
| C(11)-C(10)-C(9)  | 120.00(14) | C(17)-C(18)-H(11) | 119.9      |
| C(11)-C(10)-H(5)  | 120.0      | C(19)-C(18)-H(11) | 119.9      |
| C(9)-C(10)-H(5)   | 120.0      | C(18)-C(19)-C(20) | 119.78(16) |
| C(10)-C(11)-C(12) | 120.53(14) | C(18)-C(19)-H(12) | 120.1      |
| C(10)-C(11)-H(6)  | 119.7      | C(20)-C(19)-H(12) | 120.1      |
| C(12)-C(11)-H(6)  | 119.7      | C(19)-C(20)-C(15) | 121.07(15) |
| C(13)-C(12)-C(11) | 119.55(14) | C(19)-C(20)-H(13) | 119.5      |
| C(13)-C(12)-H(7)  | 120.2      | C(15)-C(20)-H(13) | 119.5      |
| C(11)-C(12)-H(7)  | 120.2      | C(26)-C(21)-C(22) | 117.86(15) |
| O(7)-C(13)-C(12)  | 118.69(13) | C(26)-C(21)-Si(2) | 121.37(12) |
| O(7)-C(13)-C(14)  | 121.06(13) | C(22)-C(21)-Si(2) | 120.22(12) |
| C(12)-C(13)-C(14) | 120.22(14) | C(23)-C(22)-C(21) | 121.20(16) |
| C(13)-C(14)-C(9)  | 120.40(13) | C(23)-C(22)-H(14) | 119.4      |
| C(13)-C(14)-H(8)  | 119.8      | C(21)-C(22)-H(14) | 119.4      |
| C(9)-C(14)-H(8)   | 119.8      | C(24)-C(23)-C(22) | 119.59(17) |
| C(13)-O(7)-Si(4)  | 128.19(9)  | C(24)-C(23)-H(15) | 120.2      |

|                   |            |                   |       |
|-------------------|------------|-------------------|-------|
| C(22)-C(23)-H(15) | 120.2      | Si(3)-C(28)-H(23) | 109.5 |
| C(25)-C(24)-C(23) | 120.39(17) | H(22)-C(28)-H(23) | 109.5 |
| C(25)-C(24)-H(16) | 119.8      | Si(3)-C(28)-H(24) | 109.5 |
| C(23)-C(24)-H(16) | 119.8      | H(22)-C(28)-H(24) | 109.5 |
| C(24)-C(25)-C(26) | 119.98(18) | H(23)-C(28)-H(24) | 109.5 |
| C(24)-C(25)-H(17) | 120.0      | Si(4)-C(29)-H(25) | 109.5 |
| C(26)-C(25)-H(17) | 120.0      | Si(4)-C(29)-H(26) | 109.5 |
| C(25)-C(26)-C(21) | 120.94(17) | H(25)-C(29)-H(26) | 109.5 |
| C(25)-C(26)-H(18) | 119.5      | Si(4)-C(29)-H(27) | 109.5 |
| C(21)-C(26)-H(18) | 119.5      | H(25)-C(29)-H(27) | 109.5 |
| Si(3)-C(27)-H(19) | 109.5      | H(26)-C(29)-H(27) | 109.5 |
| Si(3)-C(27)-H(20) | 109.5      | Si(4)-C(30)-H(28) | 109.5 |
| H(19)-C(27)-H(20) | 109.5      | Si(4)-C(30)-H(29) | 109.5 |
| Si(3)-C(27)-H(21) | 109.5      | H(28)-C(30)-H(29) | 109.5 |
| H(19)-C(27)-H(21) | 109.5      | Si(4)-C(30)-H(30) | 109.5 |
| H(20)-C(27)-H(21) | 109.5      | H(28)-C(30)-H(30) | 109.5 |
| Si(3)-C(28)-H(22) | 109.5      | H(29)-C(30)-H(30) | 109.5 |
